# Supplementary material
Source: PubMed Central journal article supplement (PMC2914542)
Supplement: NIHMS209640-supplement-01.pdf [file NIHMS209640-supplement-01.pdf]

**Backbone Dynamics and Global Effects  
of an Activating Mutation  
in Minimized *Mtu* RecA Inteins**

Zhenming Du<sup>1</sup>, Yangzhong Liu<sup>2</sup>, David Ban<sup>1</sup>, Maria M. Lopez<sup>4</sup>, Marlene Belfort<sup>3</sup>  
and Chunyu Wang<sup>1\*</sup>

<sup>1</sup>Department of Biology, <sup>4</sup>Center for Biotechnology and Interdisciplinary Studies, Rensselaer  
Polytechnic Institute, Troy, NY 12180

<sup>2</sup>Department of Chemistry, University of Science and Technology of China, Hefei, Anhui,  
P.R.China 230026

<sup>3</sup>Wadsworth Center, New York State Department of Health, Center for Medical Sciences,  
150 New Scotland Avenue, Albany, NY 12208

**Supplementary Data**

**Contents:**

- 1. Supplementary methods and materials;**
- 2. AUC (Figure S1); Protection factors for HD exchange (Figure S1);**
- 3. Protection factors for HD exchange (Figure S2);**
- 4. Relaxation rates (Figure S3);**
- 5. Comparison of residual dipolar coupling observed and calculated using PALES program for  $\Delta\Delta$ Ihh-V67CM and  $\Delta\Delta$ Ihh-L67CM (Figure S4);**
- 6. HD exchange results for  $\Delta\Delta$ Ihh-V67CM and  $\Delta\Delta$ Ihh-L67CM at 298 K (Table S1);**
- 7. Chemical shifts of backbone and sidechain amide group for  $\Delta\Delta$ Ihh-V67CM and  $\Delta\Delta$ Ihh-L67CM (Table S2);**
- 8. Statistics for relaxation parameters (Table S3);**
- 9. <sup>15</sup>N relaxation data and residual dipolar coupling (RDC) data for  $\Delta\Delta$ Ihh-V67CM and  $\Delta\Delta$ Ihh-L67CM at 298 K, pH=7.0. (Table S4);**
- 10. Statistics for Modelfree analysis (Table S5);**
- 11. Model-free results for  $\Delta\Delta$ Ihh-V67CM and  $\Delta\Delta$ Ihh-L67CM. (Table S6);**
- 12. Reference for supporting materials.**

## ***1. Supplementary methods and materials***

### *Analytical Ultracentrifugation (AUC)*

Equilibrium sedimentation experiments were performed using a Beckman XL-I analytical ultracentrifuge with an AN-50Ti rotor operating at 298 K. Different protein concentrations, ranging from 8 to 31  $\mu\text{M}$ , in the NMR sample buffer described above, were loaded into six-sector cells and spun at three different speeds (20,000, 25,000 and 35,000 rpm). The absorbance at 280 nm,  $A$ , was recorded as a function of the radial position,  $r$ . Equilibrium was attained when scans separated by six hours were identical. The data were globally fitted using nonlinear regression software NLReg (<http://www.nlreg.com/>) according to a model in which a single idealspecies is present in solution:

$$A(r) = I + A_o(r_o) \cdot \exp\left[\frac{\omega^2}{2RT} M(1 - v\rho)(r^2 - r_o^2)\right] \quad (1)$$

where  $A(r)$  is the absorbance of the protein at a radius  $r$ ,  $A_o(r_o)$  is the absorbance at a radius  $r_o$ ,  $I$  is the baseline offset constant,  $\omega$  is the angular velocity,  $R$  is the universal gas constant equal to  $8.134 \times 10^7 \text{ erg mol}^{-1} \text{ K}^{-1}$ ,  $T$  is the temperature in Kelvin,  $M$  is the molecular mass,  $v$  is the partial specific volume of the protein ( $0.7524 \text{ cm}^3/\text{g}$  for  $\Delta\Delta\text{Ihh-V67CM}$  and  $0.7527 \text{ cm}^3/\text{g}$  for  $\Delta\Delta\text{Ihh-L67CM}$ , calculated from their amino acid composition<sup>1</sup> and  $\rho$  is the density of the solution ( $1.00 \text{ g/cm}^3$ ). The goodness of the fit was assessed by the magnitude and distribution of the residuals.

### *Details for Modelfree analysis*

$^{15}\text{N}$  NMR relaxation was analyzed using contributions from dipole–dipole (DD) and chemical shift anisotropy (CSA) relaxation mechanisms:

$$R_1 = (d^2 / 4)[6J(\omega_H + \omega_N) + J(\omega_H - \omega_N) + 3J(\omega_N)] + c^2 J(\omega_N) \quad (2)$$

$$R_2 = (d^2 / 8)[6J(\omega_H + \omega_N) + 6J(\omega_H) + J(\omega_H - \omega_N) + 3J(\omega_N) + 4J(0)] + (c^2 / 6)[3J(\omega_N) + 4J(0)] \quad 2$$

$$NOE = 1 + (d^2 / 4R_1)(\gamma_H / \gamma_N)[6J(\omega_H + \omega_N) - J(\omega_H - \omega_N)] \quad (4)$$

where  $d = \mu_0 h \gamma_H \gamma_N \langle r_{NH}^{-3} \rangle / 8\pi^2$ ,  $c = \omega_N \Delta\sigma / \sqrt{3}$ ,  $\mu_0$  is the permeability of free space,  $h$  is Planck's constant,  $\gamma_H$  and  $\gamma_N$  are the magnetogyric ratios of  $^1\text{H}$  and  $^{15}\text{N}$ , respectively,  $r_{NH}$  is the mean nitrogen–hydrogen bond length (taken here to be 1.02 Å), and  $\Delta\sigma = \sigma_{\parallel} - \sigma_{\perp}$  is the CSA, taken here to be  $-172$  ppm. This combination of  $r_{NH}$  and CSA typically leads to an average order parameter of 0.85 for rigid secondary structure elements.<sup>2</sup> ( $\omega$ ) denotes the spectral density function of each NH bond at various frequencies;  $\omega_H$  and  $\omega_N$  are the Larmor frequencies of  $^1\text{H}$  and  $^{15}\text{N}$ , respectively.

We have chosen X-ray structure of  $\Delta\Delta\text{Ihh-L67CM}$  (pdb code: 2IN8) to fit our experimental NMR relaxation data. From that structure, we can see it is a globular protein of ellipsoidal shape with dimensions of  $37 \text{ \AA} \times 49 \text{ \AA} \times 64 \text{ \AA}$ . The hydrogen atoms were added to the structure file using program InsightII (Accelrys Inc., San Diego, CA) and all of the coordinates of water molecules are removed thereafter. The inertia tensor for  $\Delta\Delta\text{Ihh-L67CM}$  has principal moments with the ratio 1.48:1.15:1.00 (program PDBINERTIA, A. G. Palmer, Columbia University), leading to the expectation of a diffusion tensor with a small degree of axially symmetric anisotropy. Therefore, to discern effects of global rotation from those of residue-specific motions, an analysis of rotational diffusion was carried out. QUADRIC (A. G. Palmer, Columbia University) was used to carry out an initial estimate of the overall tumbling ( $\tau_m$ ) of minimized *Mtu* RecA intein and determine the diffusion tensors for spherical, axially symmetric, and fully anisotropic motional models using  $R_2/R_1$  ratios and

PDB coordinates prepared above. In the analysis of  $\Delta\Delta\text{Ihh-V67CM}$ , residues for which NOE at 600 MHz ( $^1\text{H}$  frequency)  $< 0.65$  (A65, E99, T100, L404, and V408) were eliminated from consideration for the initial estimate of the diffusion tensor, due to the possibility of significant internal motion.

The criterion <sup>3</sup>

$$\frac{\langle T_2 \rangle - T_{2,i}}{\langle T_2 \rangle} - \frac{\langle T_1 \rangle - T_{1,i}}{\langle T_1 \rangle} < 1.5 \times SD \quad (5)$$

was applied to all residues.  $\langle T_1 \rangle$  and  $\langle T_2 \rangle$  are the average  $T_1$  or  $T_2$  values for all residues in the protein that are considered and  $T_{1,i}$  and  $T_{2,i}$  are the  $T_1$  and  $T_2$  values of individual residues in the protein that are subject to test.  $SD$  is the standard deviation of the collection of all the values in the left that are considered. Residues with high  $R_2$  values ( $R_2 \geq \langle R_2 \rangle + \sigma R_2$ ) were also excluded, unless their corresponding  $R_1$  values were low ( $R_1 \leq \langle R_1 \rangle - \sigma R_1$ )<sup>4</sup>, where  $\langle R_i \rangle$  and  $\sigma R_i$  are the average and standard deviation of the relaxation rate, respectively. This further eliminated G5, R7, G25, R26, V46, E426, T430, and V438, because of probable chemical exchange contributions. The  $T_1^{600}/T_2^{600}$  ratios of the remaining 107 residues were used to calculate local correlation times and estimate isotropic, axially symmetric, and fully anisotropic diffusion tensors by the quadratic representation approach of Brüschweiler.<sup>5</sup> Similarly, in the analysis of  $\Delta\Delta\text{Ihh-L67CM}$ , residues E99, T100, L404, and V408 were eliminated because  $\text{NOE}^{600} < 0.65$ . Residues G25, V46, E426, L428, T430, and N440 were eliminated because of the criterion in Eq. 5. The choice between isotropic, axial, and fully anisotropic diffusion tensors calculated from the  $T_1/T_2$  data and the quality of the model was characterized by the goodness of the fit based on the minimum of  $\chi^2$  and F-test. The axial diffusion tensors fit the 600 MHz  $\Delta\Delta\text{Ihh-V67CM}$  data shows improvement over the best isotropic correlation time of  $7.77 \pm 0.01$  ns. The 600 MHz data diffusion tensor was oblate

( $\tau_m = 7.76 \pm 0.01$  ns,  $D_{\parallel}/D_{\perp} = 0.89 \pm 0.02$ ;  $F=8.8$  (axial symmetric over isotropic) vs  $F=2.68$  for  $\alpha=0.05$ ). The axial tensor was also compared to the fully anisotropic result ( $\tau_m = 7.75 \pm 0.01$  ns,  $2D_{zz}/(D_{xx} + D_{yy}) = 1.09 \pm 0.01$ ,  $D_{xx}/D_{yy} = 0.91 \pm 0.01$ ). The fully anisotropic tensor was neither prolate-like nor oblate like ( $2D_{zz}/(D_{xx} + D_{yy}) > 1$  but  $D_{xx}/D_{yy} \approx \neq 1$ ) and no significant improvement was observed over the axial diffusion tensors fit ( $F=1.0$  vs  $F=3.1$  choosing at confidence level of  $\alpha=0.05$ ). Since the best statistical results from the diffusion tensor analysis were obtained by fitting the data with the axially symmetric model, we chose this model as the initial input to the program MofelFree to fit the global tumbling of both  $\Delta\Delta\text{Ihh-V67CM}$  and  $\Delta\Delta\text{Ihh-L67CM}$  and explore the their backbone dynamics of  $\Delta\Delta\text{Ihh-V67CM}$ . The same parameters for initial estimate of the rotational diffusion tensor were used for the model-free analysis of  $\Delta\Delta\text{Ihh-L67CM}$ , because it likely has the same structure as  $\Delta\Delta\text{Ihh-V67CM}$ . The final diffusion tensor was determined by a global fit of diffusion tensor and internal motional parameters.

The amplitudes and time scales of the intramolecular internal motions of the protein were determined from the relaxation data according to the model-free formalism pioneered by Lipari and Szabo<sup>6-7</sup> and extended by Clore et al.<sup>8</sup>, by using the program Modelfree (version 4.15, A. G. Palmer, Columbia University) in combination with FastModelfree.<sup>9</sup> PDB coordinates of  $\Delta\Delta\text{Ihh-L67CM}$  (2IN8)<sup>11</sup> were accessed from [www.pdb.org](http://www.pdb.org). The hydrogen atoms were added to the structure file using program InsightII (Accelrys Inc., San Diego, CA) and all of the coordinates of water molecules are removed thereafter. The coordinate system of the PDB entry was moved to the center of mass of the molecule using PDBINERTIA (A. G. Palmer, Columbia University). QUADRIC (A. G. Palmer, Columbia University) was used

to carry out an initial estimate of the overall tumbling ( $\tau_m$ ) of *Mtu* RecA and determine the diffusion tensors for spherical, axially symmetric, and fully anisotropic motional models using  $R_2/R_1$  ratios and PDB coordinates prepared above. Residues with NOE values of  $<0.65$  were eliminated as well as residues with high  $R_2$  values ( $R_2 \geq \langle R_2 \rangle + \sigma R_2$ ), unless their corresponding  $R_1$  values were low ( $R_1 \leq \langle R_1 \rangle - \sigma R_1$ ). <sup>4</sup>The axis of the PDB coordinate system was rotated so that they were aligned with the principal axis of the diffusion tensor after QUADRIC analysis and the F test was used to check the statistical improvement of the fitting to each model. In model-free analysis, the spectral density function,  $J(\omega)$ , chosen to reflect an axially symmetric diffusion tensor, is modeled as <sup>11-12</sup>

$$J(\omega) = \frac{2}{5} S_f^2 \sum_{j=1}^3 A_j \left[ \frac{S_s^2 \tau_j}{1+(\omega\tau_j)^2} + \frac{(1-S_s^2)\tau_j'}{1+(\omega\tau_j')^2} \right] \quad (6)$$

where  $S^2 (=S_f^2 S_s^2)$  is the square of the generalized order parameter characterizing the amplitude of internal motions, and  $S_f^2$  and  $S_s^2$  are the squares of the order parameters for the internal motions on the fast ( $\tau_e < \sim 200$ ps) and slow ( $\tau_e > \sim 200$ ps) time scales, respectively.  $\tau_j' = \tau_j \tau_e / (\tau_j + \tau_e)$ ,  $\tau_e$  is the effective correlation time for internal motions,  $\tau_1^{-1} = 6D_{\perp}$ ,  $\tau_2^{-1} = 5D_{\perp} + D_{\parallel}$ ,  $\tau_3^{-1} = 2D_{\perp} + 4D_{\parallel}$ ,  $D_{\perp}$  and  $D_{\parallel}$  are the components of an axially symmetric diffusion tensor.  $A_1 = (3 \cos^2\theta - 1)^2/4$ ,  $A_2 = 3 \sin^2\theta \cos^2\theta$ , and  $A_3 = (3/4) \sin^4\theta$ , where  $\theta$  is the angle between the N-H vector and the unique axis of the principal component of the diffusion tensor.

$\tau_e$  is the effective correlation time for internal motions.

The selection of the models for model-free analysis was carried out using a procedure previously proposed by Mandel et al. <sup>13</sup> The five models used to fit our experimental relaxation data were

Model 1:  $S^2(\tau_e=0, R_{ex}=0, S_f^2=1)$

Model 2:  $S^2, \tau_e (R_{ex}=0, S_f^2=1)$

Model 3:  $S^2, R_{ex}(\tau_e=0, S_f^2=1)$

Model 4:  $S^2, \tau_e, R_{ex} (S_f^2=1)$

Model 5:  $S^2, \tau_e, S_f^2(R_{ex}=0)$ .

The model-free analysis results for both  $\Delta\Delta\text{Ihh-V67CM}$  and  $\Delta\Delta\text{Ihh-L67CM}$  are summarized and compared in Table S3. The detailed results are listed in the supplementary material Table S6. The results are plotted against residue number in Figure 4 for both  $\Delta\Delta\text{Ihh-V67CM}$  and  $\Delta\Delta\text{Ihh-L67CM}$ . The majority of the residues (~67%) can be fitted to model 1, indicating that internal motions for these residues are so rapid ( $\tau_e=0$ ) that their only effect is to reduce the order parameter from 1 to  $S^2$ . A significant number of residues were fitted to model 2, which means that for these residues, fast internal motions  $\tau_e$  on the sub-nanosecond time scale contributes significantly to the observed relaxation. Several residues were fitted to model 3 (G5, R18, E20, R26, F49, E426, T430, A433, and V438 in  $\Delta\Delta\text{Ihh-V67CM}$ ; G5, H30, V46, E424, L428, T430, and N440 in  $\Delta\Delta\text{Ihh-L67CM}$ ) for which a slow (microsecond-to-millisecond) component of motion  $R_{ex}$  resulting in exchange broadening was needed. Six residues (K27, I29, R92, R419, E424, and L428) in  $\Delta\Delta\text{Ihh-V67CM}$  while none in  $\Delta\Delta\text{Ihh-L67CM}$  were fitted to model 4, suggesting that for these residues both  $\tau_e$  and  $R_{ex}$  contributed significantly to the relaxation. Finally, model 5 were used to fit two residues in  $\Delta\Delta\text{Ihh-V67CM}$  (G64 and A65) and four residues (R54, G65, T100, and A418) in  $\Delta\Delta\text{Ihh-L67CM}$ , where there are two-time scale internal motions that contributes to the relaxation. On both cases, three residues were not fitted to any model (H30, V98, and R405 in  $\Delta\Delta\text{Ihh-V67CM}$ ; V23, T77, and Y79 in  $\Delta\Delta\text{Ihh-L67CM}$ ).

## 2. Figure S1

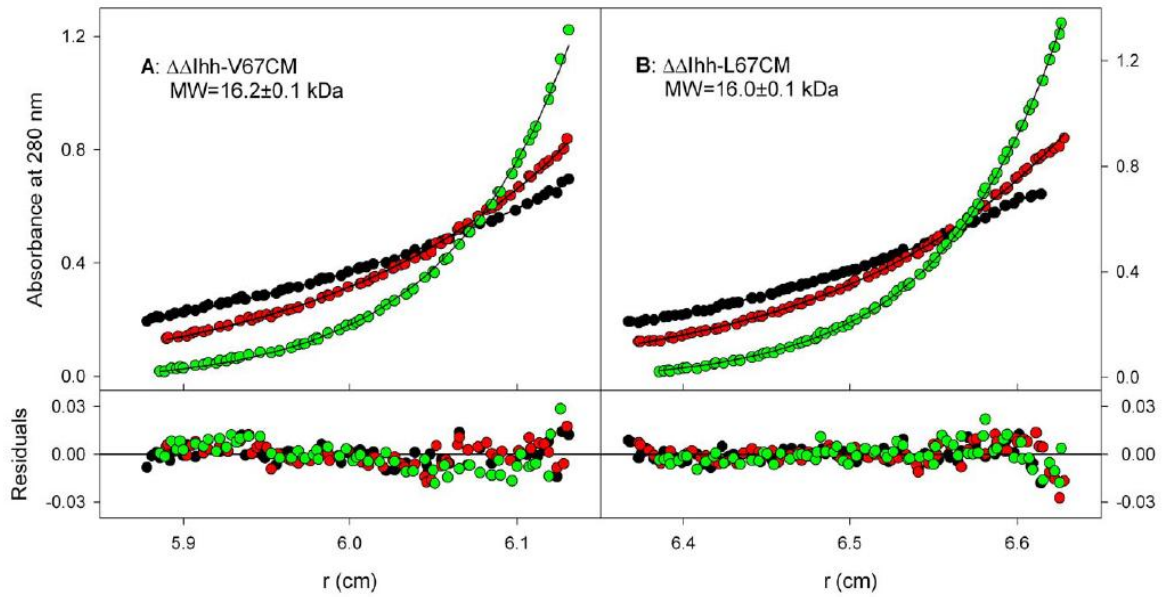

**Figure S1.** Equilibrium sedimentation analysis of  $\Delta\Delta\text{Ihh-V67CM}$  (A) and  $\Delta\Delta\text{Ihh-L67CM}$  (B) proteins at 298 K. Representative traces at 20,000 rpm, 25,000 rpm (red) and 35,000 rpm. Solid lines represent the global fit according to equation (1) in Material and Methods. The molecular weight obtained for  $\Delta\Delta\text{Ihh-V67CM}$  and  $\Delta\Delta\text{Ihh-L67CM}$  from the fits were  $16.2 \pm 0.1$  kDa and  $16.0 \pm 0.1$  kDa, respectively, while the theoretical molecular weights are 15487.4Da and 15473.4 Da, respectively (assuming 100%  $^{15}\text{N}$  labeling).



### 3. Figure S2

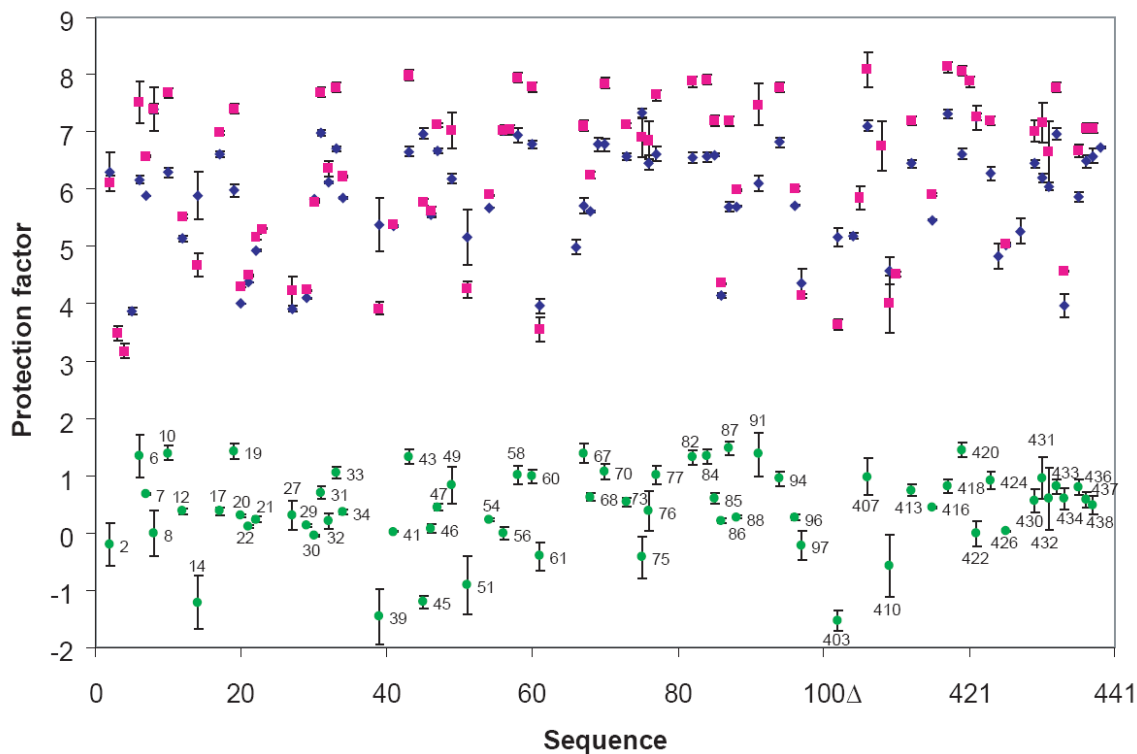

**Figure S2:** Comparison of the protection factor between  $\Delta\Delta\text{Ihh-V67CM}$  (red) and  $\Delta\Delta\text{Ihh-L67CM}$  (blue) plotted against residue number. The protection factor enhancement is obtained through equation  $\Delta P = P_{\Delta\Delta\text{Ihh-L67CM}} - P_{\Delta\Delta\text{Ihh-V67CM}}$  and are colored in green.

4. Figure S3

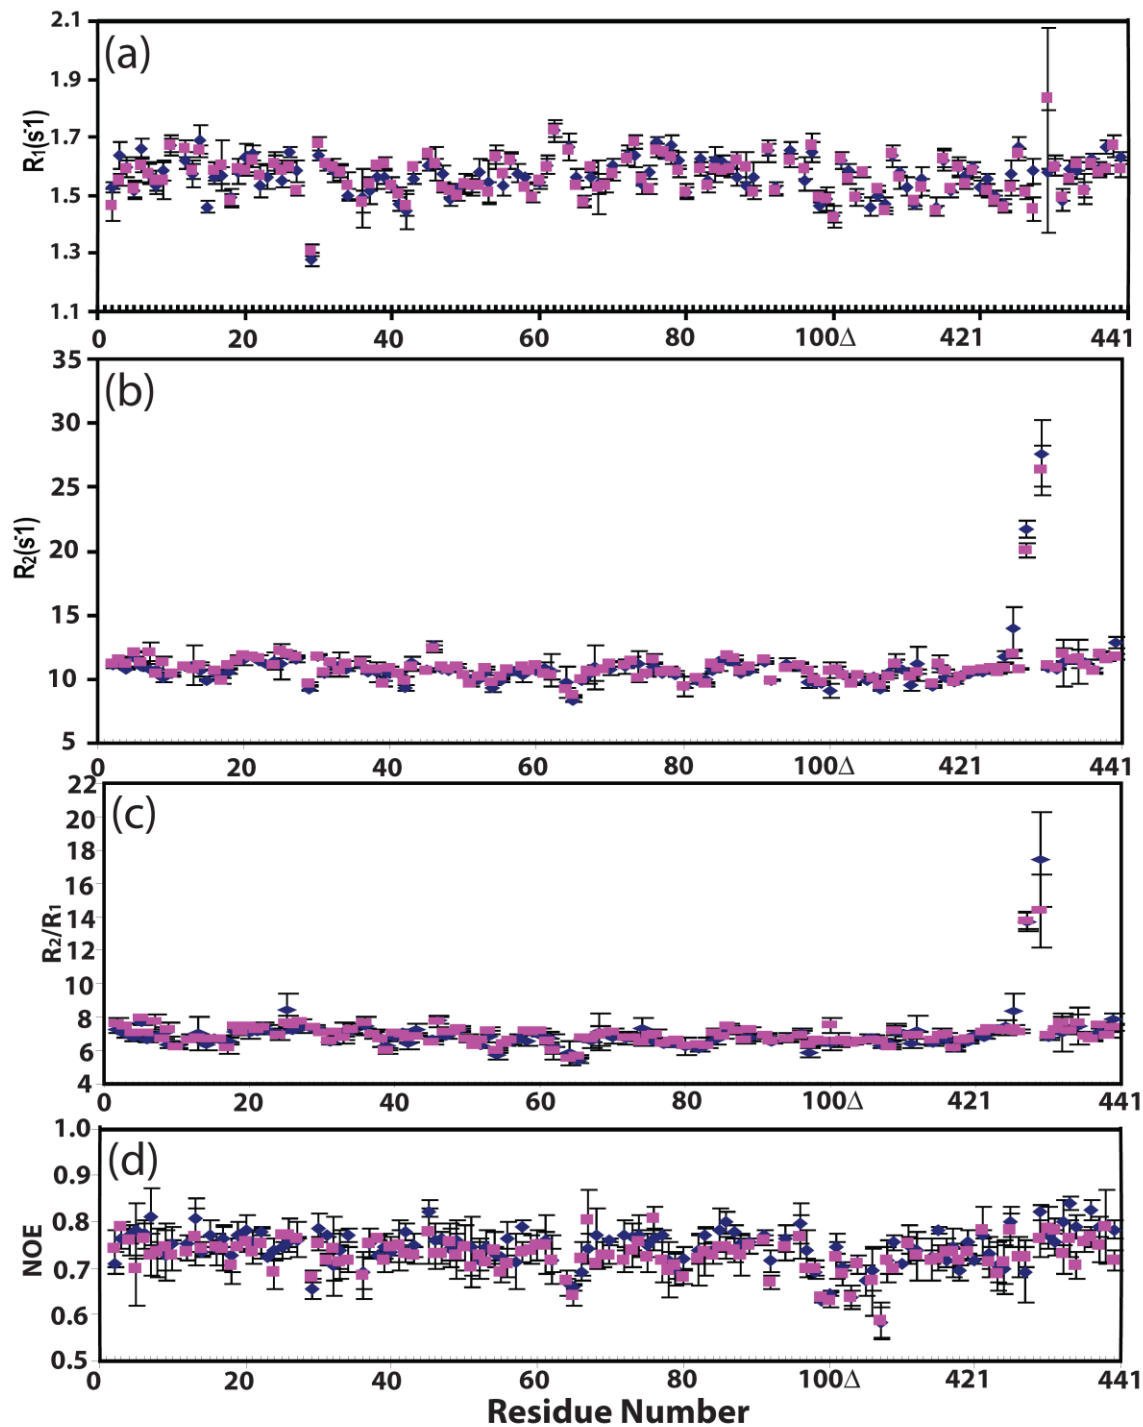

**Figure S3.** Comparison of  $R_1$ ,  $R_2$ ,  $R_2/R_1$ , and NOE measured at 600 MHz and 298 K between  $\Delta\Delta$ Ihh-V67CM (red) and  $\Delta\Delta$ Ihh-L67CM (blue).

5. Figure S4

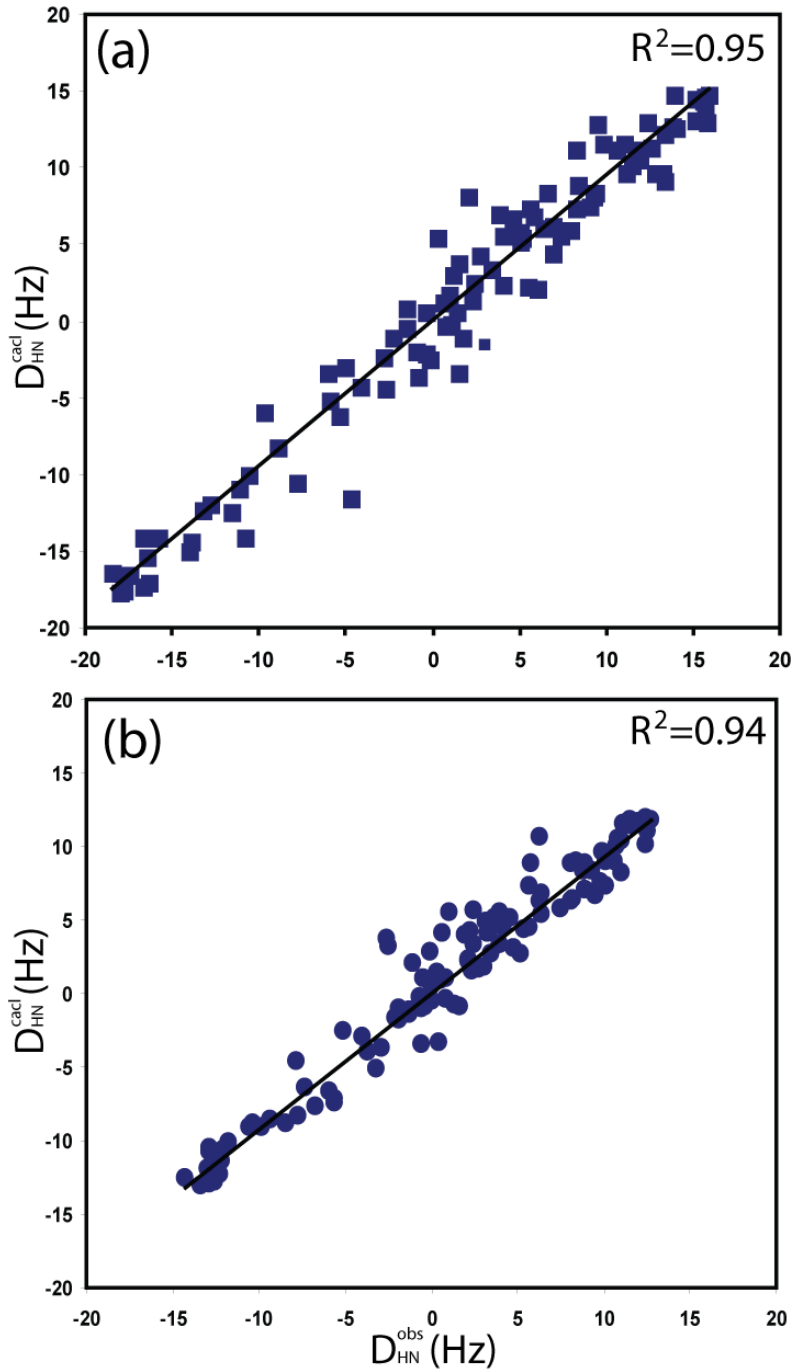

**Figure S4:** Comparison of residual dipolar coupling observed and calculated using PALES program for (a)  $\Delta\Delta I_{hh}$ -V67CM and (b)  $\Delta\Delta I_{hh}$ -L67CM.

**6. Table S1. HD exchange results for  $\Delta\Delta\text{Ihh-V67CM}$  and  $\Delta\Delta\text{Ihh-L67CM}$  at 298 K.**

H-D exchange rates and protection factors. Fast exchange represents peaks that were isolated but were not observed in the first HSQC spectrum after exchange in D<sub>2</sub>O started.

| Res | 2°       | $\Delta\Delta\text{Ihh-V67CM}$<br>$k_{\text{ex}}(\text{min}^{-1})$ | P       | $\Delta\Delta\text{Ihh-L67CM}$<br>$k_{\text{ex}}(\text{min}^{-1})$ | P       | Diff<br>$P_{\text{diff}}$ |
|-----|----------|--------------------------------------------------------------------|---------|--------------------------------------------------------------------|---------|---------------------------|
| C1  | $\beta$  | Fast exchange                                                      |         |                                                                    |         |                           |
| L2  | $\beta$  | (8.1±6.4)E-03                                                      | 6.3±0.3 | (1.3±0.4)E-02                                                      | 6.1±0.1 | -0.2                      |
| A3  | $\beta$  | Fast exchange                                                      |         | (8.2±2.4)E-02                                                      | 3.5±0.1 |                           |
| E4  | $\beta$  | Fast exchange                                                      |         | (8.7±2.6)E-02                                                      | 3.2±0.1 |                           |
| G5  |          | (7.3±1.1)E-02                                                      | 3.9±0.1 | Fast exchange                                                      |         |                           |
| T6  | $\beta$  | (3.5±0.5)E-04                                                      | 6.2±0.1 | (1.6±1.3)E-05                                                      | 7.5±0.4 | 1.3                       |
| R7  | $\beta$  | (1.0±0.1)E-03                                                      | 5.9±0.1 | (2.1±0.1)E-04                                                      | 6.6±0.1 | 0.7                       |
| I8  | $\beta$  | <5.0E-06                                                           | >7.4    | <5.00E-06                                                          | >7.4    |                           |
| F9  | $\beta$  | Fast exchange                                                      |         |                                                                    |         |                           |
| D10 | $\beta$  | (1.2±0.3)E-04                                                      | 6.3±0.1 | <5.00E-06                                                          | >7.7    | >1.4                      |
| P11 |          | Proline                                                            |         |                                                                    |         |                           |
| V12 |          | (3.4±0.4)E-04                                                      | 5.1±0.1 | (1.4±0.1)E-04                                                      | 5.5±0.1 | 0.4                       |
| T13 |          | Fast exchange                                                      |         |                                                                    |         |                           |
| G14 |          | (1.5±1.5)E-03                                                      | 5.9±0.4 | (2.5±1.2)E-02                                                      | 4.7±0.2 | -1.2                      |
| T15 | $\beta$  | Overlap                                                            |         | Fast exchange                                                      |         |                           |
| T16 | $\beta$  | Fast exchange                                                      |         |                                                                    |         |                           |
| H17 | $\beta$  | (3.9±0.5)E-04                                                      | 6.6±0.1 | (1.6±0.1)E-04                                                      | 7.0±0.1 | 0.4                       |
| R18 | $\beta$  | Fast exchange                                                      |         |                                                                    |         |                           |
| I19 | $\beta$  | (1.3±0.3)E-04                                                      | 6.0±0.1 | <5.0E-06                                                           | >7.4    | >1.4                      |
| E20 | $\alpha$ | (7.4±1.4)E-03                                                      | 4.0±0.1 | (3.7±0.3)E-03                                                      | 4.3±0.1 | 0.3                       |
| D21 | $\alpha$ | (6.2±0.1)E-03                                                      | 4.4±0.1 | (4.7±0.2)E-03                                                      | 4.5±0.1 | 0.1                       |
| V22 | $\alpha$ | (6.3±0.2)E-04                                                      | 4.9±0.1 | (3.7±0.4)E-04                                                      | 5.2±0.1 | 0.3                       |
| V23 | $\alpha$ | Overlap                                                            |         | (2.9±0.1)E-04                                                      | 5.3±0.1 |                           |
| G24 | $\alpha$ | Fast exchange                                                      |         |                                                                    |         |                           |
| G25 | $\alpha$ | Fast exchange                                                      |         |                                                                    |         |                           |
| R26 |          | Fast exchange                                                      |         |                                                                    |         |                           |
| K27 |          | (7.4±0.9)E-02                                                      | 3.9±0.1 | (3.7±2.2)E-02                                                      | 4.2±0.3 | 0.3                       |
| P28 |          | Proline                                                            |         |                                                                    |         |                           |
| I29 | $\beta$  | (3.5±0.1)E-03                                                      | 4.1±0.1 | (2.6±0.1)E-03                                                      | 4.2±0.1 | 0.1                       |
| H30 | $\beta$  | (8.8±0.2)E-04                                                      | 5.8±0.1 | (9.8±0.3)E-04                                                      | 5.8±0.1 |                           |
| V31 | $\beta$  | (2.5±0.3)E-05                                                      | 7.0±0.1 | <5.0E-06                                                           | >7.7    | >0.7                      |
| V32 | $\beta$  | (4.4±0.2)E-05                                                      | 6.1±0.1 | (2.7±0.8)E-05                                                      | 6.4±0.1 | 0.3                       |
| A33 | $\beta$  | (5.7±0.6)E-05                                                      | 6.7±0.1 | <5.0E-06                                                           | >7.8    | >1.1                      |
| A34 | $\beta$  | (5.7±0.3)E-04                                                      | 5.9±0.1 | (2.5±0.1)E-04                                                      | 6.2±0.1 | 0.3                       |
| A35 | $\beta$  | Overlap                                                            |         |                                                                    |         |                           |
| K36 |          | Fast exchange                                                      |         |                                                                    |         |                           |
| D37 |          | Fast exchange                                                      |         |                                                                    |         |                           |
| G38 |          | Fast exchange                                                      |         |                                                                    |         |                           |
| T39 | $\beta$  | (2.2±2.4)E-03                                                      | 5.4±0.5 | (6.2±1.5)E-02                                                      | 3.9±0.1 | -1.5                      |
| L40 | $\beta$  | Fast exchange                                                      |         |                                                                    |         |                           |
| H41 | $\beta$  | (2.7±0.1)E-03                                                      | 5.4±0.1 | (2.6±0.1)E-03                                                      | 5.4±0.1 | 0                         |
| A42 | $\beta$  | Fast exchange                                                      |         |                                                                    |         |                           |
| R43 | $\beta$  | (1.1±0.2)E-04                                                      | 6.7±0.1 | <5.0E-06                                                           | >8.0    | >1.3                      |
| P44 | $\beta$  | Proline                                                            |         |                                                                    |         |                           |

|       |         |                            |             |                   |              |        |
|-------|---------|----------------------------|-------------|-------------------|--------------|--------|
| V45   | $\beta$ | $<5.00E-06$                | $7.0\pm0.1$ | $(7.9\pm1.1)E-05$ | $5.8\pm0.1$  | -1.2   |
| V46   | $\beta$ | $(1.7\pm0.1)E-04$          | $5.6\pm0.1$ | $(1.4\pm0.2)E-04$ | $5.6\pm0.1$  | 0.0    |
| S47   | $\beta$ | $(1.5\pm0.1)E-04$          | $6.7\pm0.1$ | $(5.3\pm0.5)E-05$ | $7.1\pm0.1$  | 0.4    |
| W48   | $\beta$ | Fast exchange              |             |                   |              |        |
| F49   | $\beta$ | $(1.2\pm0.2)E-04$          | $6.2\pm0.1$ | $(1.8\pm1.3)E-05$ | $7.0\pm0.3$  | 0.8    |
| D50   | $\beta$ | Fast exchange              |             | Overlap           |              |        |
| Q51   | $\beta$ | $(2.2\pm2.4)E-03$          | $5.2\pm0.5$ | $(1.7\pm0.6)E-02$ | $4.3\pm0.1$  | -0.9   |
| G52   | $\beta$ | Fast exchange              |             |                   |              |        |
| T53   | $\beta$ | Fast exchange              |             |                   |              |        |
| R54   | $\beta$ | $(1.7\pm0.1)E-03$          | $5.7\pm0.1$ | $(9.8\pm0.3)E-04$ | $5.9\pm0.1$  | 0.2    |
| D55   | $\beta$ | Fast exchange              |             |                   |              |        |
| V56   | $\beta$ | $<5.0E-06$                 | $7.0\pm0.1$ | $<5.0E-06$        | $>7.0$       | $>0$   |
| I57   | $\beta$ | Overlap                    |             | $<5.0E-06$        | $>7.0$       |        |
| G58   | $\beta$ | $(5.1\pm1.5)E-05$          | $6.9\pm0.1$ | $<5.0E-06$        | $>8.0$       | $>1.0$ |
| L59   | $\beta$ | Fast exchange              |             | Overlap           |              |        |
| R60   | $\beta$ | $(5.0\pm0.9)E-05$          | $6.8\pm0.1$ | $<5.0E-06$        | $>7.8$       | $>1$   |
| I61   | $\beta$ | $(1.4\pm0.4)E-02$          | $4.0\pm0.1$ | $(3.5\pm1.7)E-02$ | $3.6\pm0.2$  | -0.4   |
| A62   | $\beta$ | Fast exchange              |             |                   |              |        |
| G63   |         | Chemical change broadening |             |                   |              |        |
| G64   |         | Fast exchange              |             |                   |              |        |
| A65   | $\beta$ | Fast exchange              |             |                   |              |        |
| I66   | $\beta$ | $(7.8\pm2.3)E-04$          | $5.0\pm0.1$ | Fast exchange     |              |        |
| V/L67 | $\beta$ | $(9.1\pm2.9)E-05$          | $5.7\pm0.1$ | $<5.0E-06$        | $>7.1$       | $>1.4$ |
| W68   | $\beta$ | $(2.9\pm0.1)E-04$          | $5.6\pm0.1$ | $(5.7\pm0.8)E-05$ | $6.2\pm0.1$  | 0.6    |
| A69   | $\beta$ | $(5.1\pm1.5)E-05$          | $6.8\pm0.1$ | Overlap           |              |        |
| T70   | $\beta$ | $(5.8\pm1.4)E-05$          | $6.8\pm0.1$ | $<5.0E-06$        | $>7.9\pm0.1$ | $>1.1$ |
| P71   |         | Proline                    |             |                   |              |        |
| D72   |         | Fast exchange              |             |                   |              |        |
| H73   | $\beta$ | $(1.8\pm0.3)E-04$          | $6.6\pm0.1$ | $(5.0\pm0.6)E-05$ | $7.1\pm0.1$  | 0.5    |
| K74   | $\beta$ | Fast exchange              |             |                   |              |        |
| V75   | $\beta$ | $<5.0E-06$                 | $7.3\pm0.1$ | $(1.3\pm1.0)E-05$ | $6.9\pm0.3$  | -0.4   |
| L76   | $\beta$ | $(2.8\pm0.8)E-05$          | $6.5\pm0.1$ | $(1.1\pm0.8)E-05$ | $6.9\pm0.3$  | 0.4    |
| T77   | $\beta$ | $(5.2\pm1.6)E-05$          | $6.6\pm0.1$ | $<5.0E-06$        | $>7.6$       | $>1.0$ |
| E78   | $\beta$ | Fast exchange              |             |                   |              |        |
| Y79   |         | Fast exchange              |             |                   |              |        |
| G80   | $\beta$ | Fast exchange              |             |                   |              |        |
| W81   | $\beta$ | Overlap                    |             |                   |              |        |
| R82   | $\beta$ | $(1.0\pm0.2)E-04$          | $6.6\pm0.1$ | $<5.0E-06$        | $>7.9$       | $>1.3$ |
| A83   | $\beta$ | Fast exchange              |             |                   |              |        |
| A84   | $\beta$ | $(1.1\pm0.2)E-04$          | $6.6\pm0.1$ | $<5.0E-06$        | $>7.9$       | $>1.3$ |
| G85   |         | $(1.9\pm0.1)E-04$          | $6.6\pm0.1$ | $(4.8\pm1.0)E-05$ | $7.2\pm0.1$  | 0.6    |
| E86   |         | $(1.3\pm0.1)E-02$          | $4.2\pm0.1$ | $(8.2\pm0.2)E-03$ | $4.4\pm0.1$  | 0.2    |
| L87   |         | $(1.5\pm0.3)E-04$          | $5.7\pm0.1$ | $<5.0E-06$        | $>7.2$       | $>1.5$ |
| R88   |         | $(6.0\pm0.2)E-04$          | $5.7\pm0.1$ | $(3.1\pm0.1)E-04$ | $6.0\pm0.1$  | 0.3    |
| K89   |         | Fast exchange              |             |                   |              |        |
| G90   |         | Overlap                    |             |                   |              |        |
| D91   | $\beta$ | $(2.4\pm0.7)E-04$          | $6.1\pm0.1$ | $(1.0\pm0.8)E-05$ | $7.5\pm0.4$  | 1.38   |
| R92   | $\beta$ | Fast exchange              |             |                   |              |        |
| V93   | $\beta$ | Overlap                    |             |                   |              |        |
| A94   | $\beta$ | $(4.5\pm1.0)E-05$          | $6.8\pm0.1$ | $<5.0E-06$        | $>7.8$       | $>1.0$ |
| V95   | $\beta$ | Overlap                    |             |                   |              |        |
| R96   | $\beta$ | $(6.7\pm0.3)E-04$          | $5.7\pm0.1$ | $(3.5\pm0.3)E-04$ | $6.0\pm0.1$  | 0.3    |
| D97   | $\beta$ | $(1.5\pm0.9)E-02$          | $4.4\pm0.2$ | $(2.5\pm0.2)E-02$ | $4.1\pm0.1$  | -0.2   |

|      |         |               |         |                |         |               |
|------|---------|---------------|---------|----------------|---------|---------------|
| V98  |         |               |         |                |         | Fast exchange |
| E99  |         |               |         |                |         | Fast exchange |
| T100 |         |               |         |                |         | Fast exchange |
| G101 |         |               |         |                |         | Fast exchange |
| E403 | $\beta$ | (1.3±0.5)E-03 | 5.2±0.1 | (4.4±0.9)E-02  | 3.6±0.1 | -1.5          |
| L404 | $\beta$ |               |         |                |         | Fast exchange |
| R405 | $\beta$ | (2.0±0.2)E-03 | 5.2±0.1 |                |         | Overlap       |
| Y406 | $\beta$ |               |         | (5.2±2.4)E-04  | 5.9±0.2 |               |
| S407 | $\beta$ | (8.3±1.8)E-05 | 7.1±0.1 | (8.7±6.2)E-06  | 8.1±0.3 | 1.0           |
| V408 | $\beta$ |               |         |                |         | Fast exchange |
| I409 | $\beta$ |               |         | (9.7±9.7)E-06  | 6.8±0.4 |               |
| R410 | $\beta$ | (7.8±4.2)E-03 | 4.6±0.2 | (2.90±3.4)E-02 | 4.0±0.5 | -0.6          |
| E411 | $\beta$ |               |         | (6.5±0.5)E-03  | 4.5±0.1 |               |
| V412 | $\beta$ |               |         |                |         | Fast exchange |
| L413 | $\beta$ | (2.8±0.5)E-05 | 6.4±0.1 | <5.0E-06       | >7.2    | >0.8          |
| P414 |         |               |         |                |         | Proline       |
| T415 |         |               |         |                |         | Fast exchange |
| R416 | $\beta$ | (2.7±0.1)E-03 | 5.5±0.1 | (9.7±0.5)E-04  | 5.9±0.1 | 0.4           |
| R417 | $\beta$ |               |         |                |         | Fast exchange |
| A418 | $\beta$ | (3.3±0.6)E-05 | 7.3±0.1 | <5.0E-06       | >8.1    | >0.8          |
| R419 | $\beta$ |               |         |                |         | Fast exchange |
| T420 | $\beta$ | (1.4±0.3)E-04 | 6.6±0.1 | <5.0E-06       | >8.1    | >1.5          |
| F421 | $\beta$ |               |         | <5.0E-06       | >7.9    |               |
| G422 | $\beta$ | (4.8±0.7)E-05 | 7.3±0.1 | (5.0±2.4)E-05  | 7.3±0.2 | 0             |
| L423 | $\beta$ |               |         |                |         | Fast exchange |
| E424 | $\beta$ | (4.2±1.2)E-05 | 6.3±.1  | <5.0E-06       | >7.2    | >0.9          |
| V425 | $\beta$ | (8.6±4.3)E-04 | 4.8±0.2 |                |         | Fast exchange |
| E426 | $\beta$ | (8.8±0.1)E-04 | 5.0±0.1 | (8.4±0.3)E-04  | 5.1±0.1 | 0.1           |
| E427 |         |               |         |                |         | Fast exchange |
| L428 |         | (4.1±2.2)E-04 | 5.3±0.2 |                |         | Overlap       |
| H429 | $\beta$ |               |         |                |         | Fast exchange |
| T430 | $\beta$ | (3.7±0.5)E-04 | 6.4±0.1 | (1.0±0.4)E-04  | 7.0±0.2 | 0.6           |
| L431 | $\beta$ | (1.1±0.2)E-04 | 6.2±0.1 | (1.2±1.0)E-05  | 7.2±0.3 | 1.0           |
| V432 | $\beta$ | (4.5±0.7)E-05 | 6.0±0.1 | (1.1±1.4)E-05  | 6.7±0.5 | 0.7           |
| A433 | $\beta$ | (3.3±0.8)E-05 | 7.0±0.1 | <5.0E-06       | >7.8    | >0.8          |
| E434 |         | (1.4±0.6)E-02 | 4.0±0.2 | (3.5±0.1)E-03  | 4.6±0.1 | 0.6           |
| G435 | $\beta$ |               |         |                |         | Fast exchange |
| V436 | $\beta$ | (1.6±0.3)E-04 | 5.9±0.1 | (2.6±0.7)E-05  | 6.7±0.1 | 0.8           |
| V437 | $\beta$ | (1.9±0.5)E-05 | 6.5±0.1 | <5.0E-06       | >7.1    | >0.6          |
| V438 | $\beta$ | (1.5±0.5)E-05 | 6.6±0.1 | <5.0E-06       | >7.1    | >0.5          |
| H439 | $\beta$ | (1.4±0.1)E-04 | 6.7±0.1 |                |         | Overlap       |
| N440 | $\beta$ |               |         |                |         | Fast exchange |

**7. Table S2. Chemical shifts of backbone and sidechain amide group for  $\Delta\Delta\text{Ihh-V67CM}$  and  $\Delta\Delta\text{Ihh-L67CM}$  (Table S1);**

All chemical shifts were acquired at 298 K in 50 mM sodium phosphate buffer with 100 mM NaCl, pH=7.0. Chemical shifts that are not acquired are marked with “X”.

| Res.   | Atom Type       | $\Delta\Delta\text{Ihh-V67CM}$ | $\Delta\Delta\text{Ihh-L67CM}$ |
|--------|-----------------|--------------------------------|--------------------------------|
| Cys 1  | HN              | X                              | X                              |
|        | $^{15}\text{N}$ | X                              | X                              |
| Leu 2  | HN              | 8.99                           | 9.08                           |
|        | $^{15}\text{N}$ | 122.93                         | 122.57                         |
| Ala 3  | HN              | 8.20                           | 8.21                           |
|        | $^{15}\text{N}$ | 120.95                         | 121.27                         |
| Glu 4  | HN              | 8.77                           | 8.77                           |
|        | $^{15}\text{N}$ | 121.27                         | 121.26                         |
| Gly 5  | HN              | 11.31                          | 11.32                          |
|        | $^{15}\text{N}$ | 120.12                         | 120.06                         |
| Thr 6  | HN              | 7.89                           | 7.94                           |
|        | $^{15}\text{N}$ | 116.93                         | 117.12                         |
| Arg 7  | HN              | 9.63                           | 9.57                           |
|        | $^{15}\text{N}$ | 130.46                         | 130.22                         |
| Ile 8  | HN              | 9.55                           | 9.60                           |
|        | $^{15}\text{N}$ | 123.15                         | 123.84                         |
| Phe 9  | HN              | 8.26                           | 8.19                           |
|        | $^{15}\text{N}$ | 129.25                         | 129.24                         |
| Asp 10 | HN              | 8.31                           | 8.29                           |
|        | $^{15}\text{N}$ | 128.20                         | 128.17                         |
| Pro 11 | HN              | X                              | X                              |
|        | $^{15}\text{N}$ | X                              | X                              |
| Val 12 | HN              | 8.98                           | 8.96                           |
|        | $^{15}\text{N}$ | 124.20                         | 124.14                         |
| Thr 13 | HN              | 7.16                           | 7.13                           |
|        | $^{15}\text{N}$ | 107.23                         | 107.14                         |
| Gly 14 | HN              | 8.40                           | 8.39                           |
|        | $^{15}\text{N}$ | 113.00                         | 112.90                         |
| Thr 15 | HN              | 7.67                           | 7.66                           |
|        | $^{15}\text{N}$ | 117.23                         | 117.10                         |
| Thr 16 | HN              | 8.52                           | 8.52                           |
|        | $^{15}\text{N}$ | 120.43                         | 120.30                         |
| His 17 | HN              | 9.03                           | 9.01                           |
|        | $^{15}\text{N}$ | 126.87                         | 126.89                         |
| Arg 18 | HN              | 9.39                           | 9.38                           |
|        | $^{15}\text{N}$ | 120.88                         | 120.92                         |
| Ile 19 | HN              | 9.08                           | 9.02                           |
|        | $^{15}\text{N}$ | 125.49                         | 125.32                         |

|        |                 |        |        |
|--------|-----------------|--------|--------|
| Glu 20 | HN              | 10.85  | 10.88  |
|        | <sup>15</sup> N | 123.73 | 123.84 |
| Asp 21 | HN              | 7.31   | 7.31   |
|        | <sup>15</sup> N | 124.53 | 124.47 |
| Val 22 | HN              | 7.47   | 7.44   |
|        | <sup>15</sup> N | 122.03 | 121.86 |
| Val 23 | HN              | 8.35   | 8.35   |
|        | <sup>15</sup> N | 116.68 | 116.73 |
| Gly 24 | HN              | 8.33   | 8.33   |
|        | <sup>15</sup> N | 108.24 | 108.17 |
| Gly 25 | HN              | 7.36   | 7.34   |
|        | <sup>15</sup> N | 103.80 | 103.76 |
| Arg 26 | HN              | 7.28   | 7.29   |
|        | <sup>15</sup> N | 122.15 | 122.13 |
| Lys 27 | HN              | 8.05   | 8.04   |
|        | <sup>15</sup> N | 115.88 | 115.80 |
| Pro 28 | HN              | X      | X      |
|        | <sup>15</sup> N | X      | X      |
| Ile 29 | HN              | 7.54   | 7.56   |
|        | <sup>15</sup> N | 116.71 | 116.63 |
| His 30 | HN              | 8.28   | 8.28   |
|        | <sup>15</sup> N | 118.39 | 117.97 |
| Val 31 | HN              | 8.61   | 8.63   |
|        | <sup>15</sup> N | 107.33 | 107.44 |
| Val 32 | HN              | 8.88   | 8.83   |
|        | <sup>15</sup> N | 120.02 | 119.98 |
| Ala 33 | HN              | 9.30   | 9.26   |
|        | <sup>15</sup> N | 129.10 | 129.01 |
| Ala 34 | HN              | 8.12   | 8.15   |
|        | <sup>15</sup> N | 121.30 | 121.27 |
| Ala 35 | HN              | 9.11   | 9.11   |
|        | <sup>15</sup> N | 125.98 | 125.93 |
| Lys 36 | HN              | 9.00   | 8.99   |
|        | <sup>15</sup> N | 121.19 | 121.16 |
| Asp 37 | HN              | 7.78   | 7.77   |
|        | <sup>15</sup> N | 115.85 | 115.88 |
| Gly 38 | HN              | 8.16   | 8.15   |
|        | <sup>15</sup> N | 107.75 | 107.71 |
| Thr 39 | HN              | 7.70   | 7.70   |
|        | <sup>15</sup> N | 110.45 | 110.42 |
| Leu 40 | HN              | 8.26   | 8.24   |
|        | <sup>15</sup> N | 120.88 | 120.86 |
| His 41 | HN              | 9.26   | 9.26   |



|        |                          |        |        |
|--------|--------------------------|--------|--------|
|        | $^{15}\text{N}$          | 120.29 | 120.16 |
| Ala 42 | HN                       | 9.19   | 9.12   |
|        | $^{15}\text{N}$          | 125.37 | 125.21 |
| Arg 43 | HN                       | 9.02   | 9.01   |
|        | $^{15}\text{N}$          | 124.69 | 124.40 |
| Pro 44 | HN                       | X      | X      |
|        | $^{15}\text{N}$          | X      | X      |
| Val 45 | HN                       | 7.86   | 7.78   |
|        | $^{15}\text{N}$          | 119.25 | 119.10 |
| Val 46 | HN                       | 8.24   | 8.21   |
|        | $^{15}\text{N}$          | 114.74 | 114.68 |
| Ser 47 | HN                       | 6.48   | 6.48   |
|        | $^{15}\text{N}$          | 113.42 | 113.39 |
| Trp 48 | HN                       | 7.65   | 7.64   |
|        | $^{15}\text{N}$          | 120.81 | 120.89 |
|        | $\text{H}_\epsilon$      | 9.25   | 9.25   |
|        | $^{15}\text{N}_\epsilon$ | 128.75 | 128.67 |
| Phe 49 | HN                       | 8.90   | 8.90   |
|        | $^{15}\text{N}$          | 120.48 | 120.40 |
| Asp 50 | HN                       | 9.10   | 9.09   |
|        | $^{15}\text{N}$          | 127.61 | 127.48 |
| Gln 51 | HN                       | 8.01   | 8.03   |
|        | $^{15}\text{N}$          | 123.41 | 123.54 |
|        | $\text{H}_{\epsilon 1}$  | 7.08   | 7.04   |
|        | $\text{H}_{\epsilon 2}$  | 6.45   | 6.42   |
|        | $^{15}\text{N}_\epsilon$ | 110.52 | 110.32 |
| Gly 52 | HN                       | 8.06   | 8.04   |
|        | $^{15}\text{N}$          | 108.53 | 108.53 |
| Thr 53 | HN                       | 8.65   | 8.62   |
|        | $^{15}\text{N}$          | 119.30 | 119.10 |
| Arg 54 | HN                       | 8.87   | 8.88   |
|        | $^{15}\text{N}$          | 126.12 | 126.07 |
| Asp 55 | HN                       | 8.03   | 8.02   |
|        | $^{15}\text{N}$          | 119.74 | 119.74 |
| Val 56 | HN                       | 9.49   | 9.49   |
|        | $^{15}\text{N}$          | 114.61 | 114.58 |
| Ile 57 | HN                       | 8.98   | 8.95   |
|        | $^{15}\text{N}$          | 114.80 | 115.07 |
| Gly 58 | HN                       | 6.71   | 6.75   |
|        | $^{15}\text{N}$          | 107.67 | 107.52 |
| Leu 59 | HN                       | 8.72   | 8.85   |
|        | $^{15}\text{N}$          | 123.52 | 124.22 |
| Arg 60 | HN                       | 8.62   | 8.65   |

|                |                              |        |        |
|----------------|------------------------------|--------|--------|
|                | <sup>15</sup> N              | 123.88 | 124.21 |
| Ile 61         | HN                           | 9.13   | 8.93   |
|                | <sup>15</sup> N              | 128.53 | 128.29 |
| Ala 62         | HN                           | 8.62   | 8.53   |
|                | <sup>15</sup> N              | 128.60 | 128.05 |
| Gly 63         | HN                           | X      | X      |
|                | <sup>15</sup> N              | X      | X      |
| Gly 64         | HN                           | 8.21   | 8.21   |
|                | <sup>15</sup> N              | 107.92 | 107.99 |
| Ala 65         | HN                           | 7.98   | 8.00   |
|                | <sup>15</sup> N              | 125.50 | 125.80 |
| Ile 66         | HN                           | 8.09   | 8.00   |
|                | <sup>15</sup> N              | 118.66 | 118.15 |
| Val /Leu<br>67 | HN                           | 8.14   | 8.24   |
|                | <sup>15</sup> N              | 125.29 | 127.80 |
| Trp 68         | HN                           | 9.72   | 9.99   |
|                | <sup>15</sup> N              | 129.00 | 129.40 |
|                | H <sub>ε</sub>               | 10.40  | 10.38  |
|                | <sup>15</sup> N <sub>ε</sub> | 131.63 | 131.48 |
| Ala 69         | HN                           | 8.92   | 8.83   |
|                | <sup>15</sup> N              | 124.45 | 124.37 |
| Thr 70         | HN                           | 8.74   | 8.74   |
|                | <sup>15</sup> N              | 112.26 | 111.60 |
| Pro 71         | HN                           | X      | X      |
|                | <sup>15</sup> N              | X      | X      |
| Asp 72         | HN                           | 8.74   | 8.73   |
|                | <sup>15</sup> N              | 112.26 | 112.39 |
| His 73         | HN                           | 8.34   | 8.34   |
|                | <sup>15</sup> N              | 125.14 | 125.23 |
| Lys 74         | HN                           | 8.42   | 8.41   |
|                | <sup>15</sup> N              | 127.66 | 127.60 |
| Val 75         | HN                           | 9.46   | 9.46   |
|                | <sup>15</sup> N              | 125.63 | 125.73 |
| Leu 76         | HN                           | 8.20   | 8.31   |
|                | <sup>15</sup> N              | 129.93 | 129.88 |
| Thr 77         | HN                           | 7.40   | 7.40   |
|                | <sup>15</sup> N              | 116.34 | 116.25 |
| Glu 78         | HN                           | 8.18   | 8.24   |
|                | <sup>15</sup> N              | 120.13 | 120.07 |
| Tyr 79         | HN                           | 7.73   | 7.75   |
|                | <sup>15</sup> N              | 117.29 | 117.32 |
| Gly 80         | HN                           | 7.36   | 7.36   |

|         |                              |        |        |
|---------|------------------------------|--------|--------|
|         | <sup>15</sup> N              | 106.92 | 106.96 |
| Trp 81  | HN                           | 9.13   | 9.07   |
|         | <sup>15</sup> N              | 125.82 | 125.75 |
|         | H <sub>ε</sub>               | 10.49  | 10.45  |
|         | <sup>15</sup> N <sub>ε</sub> | 130.50 | 130.31 |
| Arg 82  | HN                           | 9.41   | 9.45   |
|         | <sup>15</sup> N              | 124.63 | 124.68 |
| Ala 83  | HN                           | 8.84   | 8.81   |
|         | <sup>15</sup> N              | 126.02 | 125.97 |
| Ala 84  | HN                           | 9.34   | 9.35   |
|         | <sup>15</sup> N              | 125.84 | 125.85 |
| Gly 85  | HN                           | 9.75   | 9.73   |
|         | <sup>15</sup> N              | 102.34 | 102.28 |
| Glu 86  | HN                           | 8.15   | 8.16   |
|         | <sup>15</sup> N              | 117.62 | 117.65 |
| Leu 87  | HN                           | 7.21   | 7.21   |
|         | <sup>15</sup> N              | 119.83 | 119.80 |
| Arg 88  | HN                           | 9.11   | 9.13   |
|         | <sup>15</sup> N              | 120.80 | 120.92 |
| Lys 89  | HN                           | 8.45   | 8.43   |
|         | <sup>15</sup> N              | 119.88 | 119.88 |
| Gly 90  | HN                           | 8.86   | 8.91   |
|         | <sup>15</sup> N              | 115.05 | 115.15 |
| Asp 91  | HN                           | 8.18   | 8.20   |
|         | <sup>15</sup> N              | 121.76 | 121.74 |
| Arg 92  | HN                           | 8.82   | 8.78   |
|         | <sup>15</sup> N              | 118.10 | 117.88 |
| Val 93  | HN                           | 8.86   | 8.86   |
|         | <sup>15</sup> N              | 115.39 | 115.14 |
| Ala 94  | HN                           | 8.54   | 8.59   |
|         | <sup>15</sup> N              | 126.20 | 126.31 |
| Val 95  | HN                           | 8.87   | 8.88   |
|         | <sup>15</sup> N              | 115.63 | 115.24 |
| Arg 96  | HN                           | 8.15   | 8.08   |
|         | <sup>15</sup> N              | 119.79 | 119.44 |
| Asp 97  | HN                           | 8.89   | 8.90   |
|         | <sup>15</sup> N              | 131.32 | 131.24 |
| Val 98  | HN                           | 8.46   | 8.43   |
|         | <sup>15</sup> N              | 126.17 | 126.18 |
| Glu 99  | HN                           | 8.22   | 8.19   |
|         | <sup>15</sup> N              | 118.98 | 118.94 |
| Thr 100 | HN                           | 8.05   | 8.03   |
|         | <sup>15</sup> N              | 106.43 | 106.36 |

|         |                 |        |        |
|---------|-----------------|--------|--------|
| Gly 101 | HN              | 8.20   | 8.19   |
|         | <sup>15</sup> N | 111.27 | 111.26 |
| Glu 403 | HN              | 7.54   | 7.53   |
|         | <sup>15</sup> N | 118.54 | 118.50 |
| Leu 404 | HN              | 8.39   | 8.38   |
|         | <sup>15</sup> N | 121.66 | 121.82 |
| Arg 405 | HN              | 9.09   | 9.08   |
|         | <sup>15</sup> N | 126.87 | 127.17 |
| Tyr 406 | HN              | 8.35   | 8.33   |
|         | <sup>15</sup> N | 116.45 | 116.25 |
| Ser 407 | HN              | 9.28   | 9.28   |
|         | <sup>15</sup> N | 118.45 | 118.30 |
| Val 408 | HN              | 8.35   | 8.31   |
|         | <sup>15</sup> N | 122.19 | 122.30 |
| Ile 409 | HN              | 8.76   | 8.72   |
|         | <sup>15</sup> N | 123.42 | 123.54 |
| Arg 410 | HN              | 9.53   | 9.45   |
|         | <sup>15</sup> N | 130.35 | 130.33 |
| Glu 411 | HN              | 7.66   | 7.61   |
|         | <sup>15</sup> N | 117.05 | 116.80 |
| Val 412 | HN              | 8.72   | 8.74   |
|         | <sup>15</sup> N | 125.74 | 125.76 |
| Leu 413 | HN              | 9.77   | 9.85   |
|         | <sup>15</sup> N | 132.54 | 132.73 |
| Pro 414 | HN              | X      | X      |
|         | <sup>15</sup> N | X      | X      |
| Thr 415 | HN              | 7.75   | 7.73   |
|         | <sup>15</sup> N | 112.94 | 112.70 |
| Arg 416 | HN              | 9.16   | 9.15   |
|         | <sup>15</sup> N | 123.40 | 123.27 |
| Arg 417 | HN              | 8.40   | 8.39   |
|         | <sup>15</sup> N | 119.22 | 119.24 |
| Ala 418 | HN              | 8.75   | 8.75   |
|         | <sup>15</sup> N | 125.06 | 125.01 |
| Arg 419 | HN              | 8.74   | 8.74   |
|         | <sup>15</sup> N | 120.97 | 120.91 |
| Thr 420 | HN              | 7.76   | 7.76   |
|         | <sup>15</sup> N | 111.55 | 111.53 |
| Phe 421 | HN              | 8.98   | 9.00   |
|         | <sup>15</sup> N | 114.80 | 114.50 |
| Gly 422 | HN              | 9.53   | 9.50   |
|         | <sup>15</sup> N | 107.77 | 107.62 |
| Leu 423 | HN              | 8.43   | 8.46   |

|         |                              |        |        |
|---------|------------------------------|--------|--------|
|         | <sup>15</sup> N              | 118.87 | 118.87 |
| Glu 424 | HN                           | 7.09   | 7.13   |
|         | <sup>15</sup> N              | 118.58 | 118.62 |
| Val 425 | HN                           | 8.86   | 8.81   |
|         | <sup>15</sup> N              | 129.45 | 129.26 |
| Glu 426 | HN                           | 8.15   | 8.08   |
|         | <sup>15</sup> N              | 128.75 | 128.57 |
| Glu 427 | HN                           | 8.54   | 8.50   |
|         | <sup>15</sup> N              | 121.11 | 121.03 |
| Leu 428 | HN                           | 9.42   | 9.45   |
|         | <sup>15</sup> N              | 120.83 | 120.98 |
| His 429 | HN                           | 7.10   | 7.06   |
|         | <sup>15</sup> N              | 107.70 | 107.57 |
| Thr 430 | HN                           | 6.93   | 6.95   |
|         | <sup>15</sup> N              | 105.49 | 105.75 |
| Leu 431 | HN                           | 9.13   | 9.12   |
|         | <sup>15</sup> N              | 111.69 | 111.71 |
| Val 432 | HN                           | 7.58   | 7.51   |
|         | <sup>15</sup> N              | 119.63 | 119.67 |
| Ala 433 | HN                           | 9.73   | 9.73   |
|         | <sup>15</sup> N              | 135.06 | 134.74 |
| Glu 434 | HN                           | 8.99   | 9.12   |
|         | <sup>15</sup> N              | 118.07 | 118.80 |
| Gly 435 | HN                           | 7.23   | 7.29   |
|         | <sup>15</sup> N              | 100.07 | 100.09 |
| Val 436 | HN                           | 8.06   | 8.11   |
|         | <sup>15</sup> N              | 122.51 | 122.46 |
| Val 437 | HN                           | 8.28   | 8.32   |
|         | <sup>15</sup> N              | 126.47 | 126.48 |
| Val 438 | HN                           | 9.37   | 9.40   |
|         | <sup>15</sup> N              | 118.76 | 118.74 |
| His 439 | HN                           | 8.66   | 8.57   |
|         | <sup>15</sup> N              | 120.69 | 121.30 |
| Asn 440 | HN                           | 7.82   | 7.93   |
|         | <sup>15</sup> N              | 126.26 | 126.83 |
|         | H <sub>δ1</sub>              | 7.34   | 7.39   |
|         | H <sub>δ2</sub>              | 8.18   | 8.19   |
|         | <sup>15</sup> N <sub>δ</sub> | 114.20 | 114.17 |

**8. Table S3. 10% trimmed mean values of  $^{15}\text{N}$  relaxation parameters acquired for  $\Delta\Delta\text{Ihh-V67CM}$  and  $\Delta\Delta\text{Ihh-L67CM}$  at 600 Mz an 298 K.**

| 600 MHz              | $\Delta\Delta\text{Ihh-V67CM}$ (120 entries) | $\Delta\Delta\text{Ihh-L67CM}$ (120 entries) |
|----------------------|----------------------------------------------|----------------------------------------------|
| $R_1(\text{s}^{-1})$ | $1.57\pm 0.03$                               | $1.57\pm 0.03$                               |
| $R_2(\text{s}^{-1})$ | $10.82\pm 0.21$                              | $10.70\pm 0.33$                              |
| NOE                  | $0.73\pm 0.03$                               | $0.75\pm 0.03$                               |
| $R_2/R_1$            | $6.92\pm 0.18$                               | $6.83\pm 0.27$                               |

9. <sup>15</sup>N relaxation data and residual dipolar coupling (RDC) data for ΔIhh-V67CM and ΔIhh-L67CM at 298 K, pH=7.0. (Table S4);

<sup>15</sup>N relaxation data were acquired at 600 MHz (<sup>1</sup>H frequency), 14.1 Telsa. Residual dipolar coupling (RDC) data were acquired at 800 MHz (<sup>1</sup>H frequency), 18.8 Telsa. RDC data were acquired using 7% polyacrylamide gels with a stretch ratio d<sub>o</sub>/d<sub>N</sub> of 1.29. The RDC was measured using IPAP-HSQC pulse sequence at 298 K.

**Table S4a : ΔIhh-V67CM:**

| Res. | R <sub>1</sub> (s <sup>-1</sup> ) | ΔR <sub>1</sub> (S <sup>-1</sup> ) | R <sub>2</sub> (S <sup>-1</sup> ) | ΔR <sub>2</sub> (S <sup>-1</sup> ) | NOE   | ΔNOE  | R <sub>2</sub> / R <sub>1</sub> | ΔR <sub>2</sub> / R <sub>1</sub> | RDC (Hz) |
|------|-----------------------------------|------------------------------------|-----------------------------------|------------------------------------|-------|-------|---------------------------------|----------------------------------|----------|
| 1    |                                   |                                    |                                   |                                    |       |       |                                 |                                  |          |
| 2    | 1.467                             | 0.057                              | 11.145                            | 0.243                              | 0.742 | 0.040 | 7.596                           | 0.339                            | 13.804   |
| 3    | 1.553                             | 0.020                              | 11.565                            | 0.192                              | 0.790 | 0.009 | 7.445                           | 0.157                            |          |
| 4    | 1.591                             | 0.031                              | 11.252                            | 0.240                              | 0.759 | 0.033 | 7.074                           | 0.206                            |          |
| 5    | 1.522                             | 0.029                              | 12.137                            | 0.079                              | 0.699 | 0.080 | 7.977                           | 0.160                            | 12.405   |
| 6    | 1.605                             | 0.024                              | 11.260                            | 0.089                              | 0.763 | 0.034 | 7.015                           | 0.119                            | -8.939   |
| 7    | 1.576                             | 0.032                              | 12.140                            | 0.673                              | 0.729 | 0.045 | 7.704                           | 0.455                            | 10.581   |
| 8    | 1.552                             | 0.035                              | 10.405                            | 0.101                              | 0.733 | 0.052 | 6.705                           | 0.165                            | -1.459   |
| 9    | 1.554                             | 0.065                              | 11.282                            | 0.479                              | 0.745 | 0.050 | 7.259                           | 0.433                            | 1.033    |
| 10   | 1.673                             | 0.023                              | 10.442                            | 0.136                              | 0.728 | 0.033 | 6.241                           | 0.119                            | -15.750  |
| 11   |                                   |                                    |                                   |                                    |       |       |                                 |                                  |          |
| 12   | 1.661                             | 0.029                              | 11.033                            | 0.226                              | 0.734 | 0.018 | 6.643                           | 0.179                            | 1.521    |
| 13   | 1.585                             | 0.026                              | 10.769                            | 0.205                              | 0.767 | 0.060 | 6.793                           | 0.169                            | -4.196   |
| 14   | 1.658                             | 0.015                              | 11.065                            | 0.255                              | 0.741 | 0.016 | 6.672                           | 0.164                            | -18.000  |
| 15   |                                   |                                    |                                   |                                    |       |       |                                 |                                  |          |
| 16   | 1.584                             | 0.031                              | 10.630                            | 0.174                              | 0.745 | 0.015 | 6.710                           | 0.172                            | -18.425  |
| 17   | 1.604                             | 0.085                              | 9.880                             | 0.189                              | 0.742 | 0.047 | 6.158                           | 0.346                            |          |
| 18   | 1.483                             | 0.022                              | 11.034                            | 0.134                              | 0.705 | 0.039 | 7.439                           | 0.144                            |          |
| 19   | 1.591                             | 0.018                              | 11.367                            | 0.317                              | 0.745 | 0.003 | 7.147                           | 0.216                            | 8.209    |
| 20   | 1.584                             | 0.017                              | 11.824                            | 0.232                              | 0.758 | 0.024 | 7.465                           | 0.166                            | 6.020    |
| 21   | 1.623                             | 0.025                              | 11.777                            | 0.238                              | 0.734 | 0.026 | 7.257                           | 0.186                            | 3.405    |
| 22   | 1.571                             | 0.037                              | 11.644                            | 0.230                              | 0.754 | 0.033 | 7.414                           | 0.229                            | 11.736   |
| 23   |                                   |                                    |                                   |                                    |       |       |                                 |                                  |          |
| 24   | 1.611                             | 0.027                              | 11.089                            | 0.315                              | 0.693 | 0.039 | 6.885                           | 0.228                            | 4.987    |
| 25   | 1.584                             | 0.034                              | 12.197                            | 0.595                              | 0.770 | 0.013 | 7.702                           | 0.409                            | 5.048    |
| 26   | 1.598                             | 0.015                              | 12.003                            | 0.221                              | 0.771 | 0.037 | 7.511                           | 0.156                            | 15.142   |
| 27   | 1.515                             | 0.017                              | 11.717                            | 0.113                              | 0.765 | 0.002 | 7.732                           | 0.112                            | 15.628   |
| 28   |                                   |                                    |                                   |                                    |       |       |                                 |                                  |          |

| Res. | $R_1(s^{-1})$ | $\Delta R_1(S^{-1})$ | $R_2(S^{-1})$ | $\Delta R_2(S^{-1})$ | NOE   | $\Delta$ NOE | $R_2/R_1$ | $\Delta R_2/R_1$ | RDC (Hz) |
|------|---------------|----------------------|---------------|----------------------|-------|--------------|-----------|------------------|----------|
| 29   | 1.310         | 0.021                | 9.690         | 0.122                | 0.682 | 0.013        | 7.395     | 0.151            | 2.068    |
| 30   | 1.676         | 0.023                | 11.790        | 0.137                | 0.752 | 0.014        | 7.035     | 0.125            |          |
| 31   | 1.607         | 0.021                | 10.559        | 0.146                | 0.718 | 0.014        | 6.569     | 0.124            | -5.898   |
| 32   | 1.600         | 0.028                | 11.348        | 0.291                | 0.741 | 0.069        | 7.092     | 0.221            | 9.243    |
| 33   | 1.583         | 0.022                | 10.675        | 0.136                | 0.712 | 0.036        | 6.744     | 0.127            | 12.527   |
| 34   | 1.534         | 0.046                | 11.156        | 0.301                | 0.718 | 0.026        | 7.275     | 0.294            |          |
| 35   |               |                      |               |                      |       |              |           |                  |          |
| 36   | 1.478         | 0.036                | 11.328        | 0.393                | 0.684 | 0.052        | 7.664     | 0.324            |          |
| 37   | 1.541         | 0.024                | 10.749        | 0.123                | 0.754 | 0.032        | 6.976     | 0.135            | 9.486    |
| 38   | 1.603         | 0.018                | 10.731        | 0.187                | 0.764 | 0.005        | 6.695     | 0.137            | -0.851   |
| 39   | 1.607         | 0.023                | 9.626         | 0.227                | 0.715 | 0.022        | 5.989     | 0.165            | -13.196  |
| 40   | 1.536         | 0.024                | 10.830        | 0.190                | 0.747 | 0.021        | 7.052     | 0.164            | -2.676   |
| 41   | 1.504         | 0.025                | 10.467        | 0.114                | 0.748 | 0.054        | 6.958     | 0.140            | 3.831    |
| 42   | 1.467         | 0.037                | 9.884         | 0.322                | 0.731 | 0.018        | 6.739     | 0.277            | 12.831   |
| 43   | 1.597         | 0.020                | 10.955        | 0.255                | 0.727 | 0.019        | 6.861     | 0.182            |          |
| 44   |               |                      |               |                      |       |              |           |                  |          |
| 45   | 1.646         | 0.017                | 10.699        | 0.206                | 0.777 | 0.068        | 6.502     | 0.142            | -17.452  |
| 46   | 1.608         | 0.058                | 12.397        | 0.282                | 0.731 | 0.033        | 7.708     | 0.329            | 5.473    |
| 47   | 1.529         | 0.017                | 10.928        | 0.109                | 0.732 | 0.021        | 7.147     | 0.107            | 0.304    |
| 48   | 1.517         | 0.023                | 10.770        | 0.168                | 0.756 | 0.040        | 7.100     | 0.153            | 0.608    |
| 49   | 1.499         | 0.015                | 10.986        | 0.174                | 0.727 | 0.049        | 7.329     | 0.136            | 0.668    |
| 50   | 1.538         | 0.034                | 10.318        | 0.277                | 0.744 | 0.048        | 6.711     | 0.232            |          |
| 51   | 1.533         | 0.024                | 9.660         | 0.212                | 0.702 | 0.043        | 6.303     | 0.171            | -10.581  |
| 52   | 1.536         | 0.013                | 10.173        | 0.143                | 0.729 | 0.034        | 6.621     | 0.108            | -1.521   |
| 53   | 1.508         | 0.039                | 10.870        | 0.145                | 0.712 | 0.003        | 7.209     | 0.212            | -0.426   |
| 54   | 1.632         | 0.025                | 9.789         | 0.204                | 0.740 | 0.037        | 6.000     | 0.155            | -14.048  |
| 55   | 1.577         | 0.015                | 10.162        | 0.085                | 0.690 | 0.020        | 6.445     | 0.081            | -17.756  |
| 56   | 1.619         | 0.027                | 10.744        | 0.130                | 0.711 | 0.032        | 6.638     | 0.137            | -0.913   |
| 57   |               |                      |               |                      |       |              |           |                  |          |
| 58   | 1.527         | 0.010                | 10.938        | 0.088                | 0.734 | 0.021        | 7.165     | 0.075            | 15.689   |
| 59   | 1.494         | 0.017                | 10.645        | 0.108                | 0.740 | 0.031        | 7.127     | 0.108            | 9.790    |
| 60   | 1.549         | 0.013                | 11.079        | 0.192                | 0.748 | 0.033        | 7.154     | 0.138            | 6.628    |
| 61   | 1.600         | 0.026                | 10.475        | 0.196                | 0.750 | 0.064        | 6.546     | 0.161            | 0.912    |
| 62   | 1.724         | 0.024                | 10.350        | 0.325                | 0.717 | 0.052        | 6.003     | 0.205            | -13.864  |
| 63   |               |                      |               |                      |       |              |           |                  |          |
| 64   | 1.653         | 0.030                | 9.185         | 0.120                | 0.672 | 0.004        | 5.557     | 0.125            |          |



| Res. | $R_1(s^{-1})$ | $\Delta R_1(S^{-1})$ | $R_2(S^{-1})$ | $\Delta R_2(S^{-1})$ | NOE   | $\Delta$ NOE | $R_2/R_1$ | $\Delta R_2/R_1$ | RDC (Hz) |
|------|---------------|----------------------|---------------|----------------------|-------|--------------|-----------|------------------|----------|
| 65   | 1.536         | 0.016                | 8.713         | 0.081                | 0.642 | 0.022        | 5.672     | 0.078            | 2.676    |
| 66   | 1.475         | 0.012                | 10.022        | 0.092                | 0.720 | 0.037        | 6.797     | 0.084            | 1.216    |
| 67   | 1.599         | 0.016                | 10.691        | 0.316                | 0.804 | 0.063        | 6.688     | 0.209            | 6.872    |
| 68   | 1.528         | 0.092                | 10.508        | 0.616                | 0.710 | 0.010        | 6.878     | 0.578            | 5.595    |
| 69   | 1.534         | 0.022                | 10.811        | 0.088                | 0.729 | 0.028        | 7.047     | 0.117            | 13.378   |
| 70   | 1.577         | 0.025                | 11.230        | 0.210                | 0.729 | 0.019        | 7.122     | 0.175            | 15.932   |
| 71   |               |                      |               |                      |       |              |           |                  |          |
| 72   | 1.629         | 0.027                | 11.045        | 0.169                | 0.718 | 0.026        | 6.778     | 0.154            | 1.338    |
| 73   | 1.683         | 0.024                | 11.397        | 0.302                | 0.737 | 0.035        | 6.772     | 0.204            | 2.311    |
| 74   | 1.557         | 0.025                | 10.059        | 0.284                | 0.755 | 0.026        | 6.462     | 0.209            | 8.331    |
| 75   | 1.523         | 0.018                | 10.473        | 0.226                | 0.725 | 0.034        | 6.876     | 0.169            | 1.764    |
| 76   | 1.657         | 0.024                | 11.586        | 0.364                | 0.807 | 0.026        | 6.990     | 0.241            | -9.669   |
| 77   | 1.648         | 0.018                | 10.544        | 0.089                | 0.716 | 0.046        | 6.397     | 0.087            | -16.480  |
| 78   | 1.631         | 0.022                | 10.679        | 0.098                | 0.696 | 0.060        | 6.547     | 0.107            |          |
| 79   | 1.584         | 0.022                | 10.532        | 0.157                | 0.704 | 0.028        | 6.647     | 0.135            |          |
| 80   | 1.510         | 0.017                | 9.472         | 0.207                | 0.680 | 0.014        | 6.275     | 0.154            | -16.723  |
| 81   |               |                      |               |                      |       |              |           |                  |          |
| 82   | 1.590         | 0.022                | 10.075        | 0.146                | 0.719 | 0.056        | 6.335     | 0.127            | -16.298  |
| 83   | 1.531         | 0.021                | 9.618         | 0.142                | 0.736 | 0.051        | 6.281     | 0.127            | -11.129  |
| 84   | 1.590         | 0.044                | 11.241        | 0.233                | 0.728 | 0.017        | 7.068     | 0.245            | 13.196   |
| 85   | 1.586         | 0.019                | 10.892        | 0.287                | 0.744 | 0.002        | 6.867     | 0.198            | 4.013    |
| 86   | 1.590         | 0.025                | 11.856        | 0.096                | 0.744 | 0.022        | 7.458     | 0.131            | 15.567   |
| 87   | 1.621         | 0.027                | 11.618        | 0.234                | 0.738 | 0.025        | 7.166     | 0.188            | 4.621    |
| 88   | 1.597         | 0.052                | 10.630        | 0.204                | 0.728 | 0.045        | 6.658     | 0.253            | 5.047    |
| 89   | 1.511         | 0.024                | 10.925        | 0.191                | 0.748 | 0.017        | 7.233     | 0.171            | 9.365    |
| 90   |               |                      |               |                      |       |              |           |                  |          |
| 91   | 1.659         | 0.021                | 11.497        | 0.137                | 0.761 | 0.011        | 6.932     | 0.120            | 4.074    |
| 92   | 1.517         | 0.017                | 9.914         | 0.079                | 0.670 | 0.013        | 6.536     | 0.089            | -11.615  |
| 93   |               |                      |               |                      |       |              |           |                  |          |
| 94   | 1.621         | 0.021                | 10.834        | 0.107                | 0.744 | 0.028        | 6.685     | 0.109            | -4.743   |
| 95   |               |                      |               |                      |       |              |           |                  |          |
| 96   | 1.594         | 0.039                | 11.059        | 0.229                | 0.767 | 0.047        | 6.936     | 0.223            |          |
| 97   | 1.675         | 0.041                | 10.698        | 0.279                | 0.700 | 0.021        | 6.387     | 0.229            | -2.797   |
| 98   | 1.495         | 0.019                | 9.949         | 0.143                | 0.700 | 0.015        | 6.654     | 0.128            | 13.865   |
| 99   | 1.489         | 0.019                | 9.801         | 0.087                | 0.637 | 0.009        | 6.582     | 0.101            | 7.358    |
| 100  | 1.425         | 0.018                | 10.686        | 0.638                | 0.631 | 0.016        | 7.500     | 0.457            | 11.067   |

| Res. | $R_1(s^{-1})$ | $\Delta R_1(S^{-1})$ | $R_2(S^{-1})$ | $\Delta R_2(S^{-1})$ | NOE   | $\Delta$ NOE | $R_2/R_1$ | $\Delta R_2/R_1$ | RDC (Hz) |
|------|---------------|----------------------|---------------|----------------------|-------|--------------|-----------|------------------|----------|
| 101  | 1.629         | 0.018                | 10.704        | 0.248                | 0.725 | 0.048        | 6.572     | 0.168            | 9.061    |
| 403  | 1.559         | 0.022                | 10.286        | 0.141                | 0.688 | 0.025        | 6.599     | 0.131            | -7.844   |
| 404  | 1.494         | 0.013                | 9.604         | 0.099                | 0.638 | 0.026        | 6.429     | 0.088            |          |
| 405  | 1.579         | 0.016                | 10.335        | 0.134                | 0.708 | 0.021        | 6.544     | 0.107            |          |
| 406  |               |                      |               |                      |       |              |           |                  |          |
| 407  | 1.524         | 0.011                | 10.132        | 0.185                | 0.672 | 0.074        | 6.650     | 0.131            | -6.020   |
| 408  | 1.448         | 0.010                | 9.533         | 0.207                | 0.587 | 0.041        | 6.584     | 0.150            |          |
| 409  | 1.644         | 0.026                | 10.201        | 0.150                | 0.716 | 0.045        | 6.205     | 0.135            | -10.824  |
| 410  | 1.562         | 0.037                | 11.222        | 0.321                | 0.698 | 0.011        | 7.183     | 0.267            | 7.966    |
| 411  |               |                      |               |                      |       |              |           |                  |          |
| 412  | 1.483         | 0.017                | 10.242        | 0.075                | 0.751 | 0.041        | 6.905     | 0.092            | 13.986   |
| 413  | 1.528         | 0.030                | 10.560        | 0.190                | 0.726 | 0.051        | 6.910     | 0.183            | 15.082   |
| 414  |               |                      |               |                      |       |              |           |                  |          |
| 415  | 1.447         | 0.019                | 9.601         | 0.148                | 0.718 | 0.045        | 6.637     | 0.136            | -0.365   |
| 416  | 1.629         | 0.032                | 11.225        | 0.670                | 0.722 | 0.027        | 6.890     | 0.433            | 8.270    |
| 417  | 1.525         | 0.015                | 10.592        | 0.144                | 0.734 | 0.031        | 6.946     | 0.116            |          |
| 418  | 1.596         | 0.026                | 9.763         | 0.086                | 0.734 | 0.052        | 6.117     | 0.111            | -16.723  |
| 419  | 1.540         | 0.019                | 10.243        | 0.102                | 0.716 | 0.012        | 6.650     | 0.104            |          |
| 420  | 1.588         | 0.027                | 10.597        | 0.077                | 0.733 | 0.017        | 6.674     | 0.123            | -5.412   |
| 421  |               |                      |               |                      |       |              |           |                  |          |
| 422  | 1.517         | 0.023                | 10.800        | 0.195                | 0.780 | 0.051        | 7.118     | 0.167            | 6.324    |
| 423  | 1.481         | 0.018                | 10.848        | 0.134                | 0.713 | 0.031        | 7.324     | 0.126            |          |
| 424  | 1.456         | 0.015                | 10.556        | 0.166                | 0.687 | 0.019        | 7.249     | 0.137            | -2.250   |
| 425  | 1.526         | 0.024                | 10.915        | 0.364                | 0.712 | 0.047        | 7.152     | 0.264            | 1.520    |
| 426  | 1.643         | 0.021                | 12.013        | 0.320                | 0.780 | 0.036        | 7.313     | 0.216            | -12.831  |
| 427  | 1.513         | 0.023                | 10.805        | 0.070                | 0.724 | 0.044        | 7.143     | 0.119            | -4.987   |
| 428  | 1.452         | 0.040                | 20.016        | 0.543                | 0.725 | 0.022        | 13.785    | 0.535            | 0.30     |
| 429  |               |                      |               |                      |       |              |           |                  |          |
| 430  | 1.832         | 0.243                | 26.335        | 1.930                | 0.763 | 0.039        | 14.375    | 2.178            | 11.128   |
| 431  | 1.597         | 0.028                | 11.077        | 0.101                | 0.787 | 0.044        | 6.938     | 0.135            | 11.858   |
| 432  | 1.495         | 0.016                | 10.873        | 0.163                | 0.782 | 0.025        | 7.273     | 0.134            | 13.318   |
| 433  | 1.558         | 0.017                | 11.920        | 0.519                | 0.731 | 0.043        | 7.650     | 0.344            | 3.041    |
| 434  | 1.611         | 0.024                | 11.538        | 0.153                | 0.763 | 0.039        | 7.162     | 0.142            | 5.169    |
| 435  | 1.519         | 0.027                | 11.596        | 0.710                | 0.706 | 0.028        | 7.636     | 0.487            | 11.493   |
| 436  | 1.610         | 0.016                | 11.042        | 0.149                | 0.758 | 0.025        | 6.859     | 0.115            | 2.371    |
| 437  | 1.581         | 0.011                | 10.624        | 0.217                | 0.767 | 0.023        | 6.721     | 0.146            | 6.933    |

| Res. | $R_1(s^{-1})$ | $\Delta R_1(S^{-1})$ | $R_2(S^{-1})$ | $\Delta R_2(S^{-1})$ | NOE   | $\Delta$ NOE | $R_2/R_1$ | $\Delta R_2/R_1$ | RDC (Hz) |
|------|---------------|----------------------|---------------|----------------------|-------|--------------|-----------|------------------|----------|
| 438  | 1.591         | 0.014                | 12.010        | 0.180                | 0.748 | 0.034        | 7.551     | 0.130            | 5.777    |
| 439  | 1.672         | 0.038                | 11.586        | 0.128                | 0.790 | 0.079        | 6.928     | 0.173            | 15.811   |
| 440  | 1.591         | 0.029                | 11.704        | 0.225                | 0.718 | 0.022        | 7.358     | 0.195            | -0.121   |

**Table S4b :  $\Delta$ Ihh-L67CM:**

| Res. | $R_1(s^{-1})$ | $\Delta R_1(S^{-1})$ | $R_2(S^{-1})$ | $\Delta R_2(S^{-1})$ | NOE   | $\Delta$ NOE | $R_2/R_1$ | $\Delta R_2/R_1$ | RDC (Hz) |
|------|---------------|----------------------|---------------|----------------------|-------|--------------|-----------|------------------|----------|
| 1    |               |                      |               |                      |       |              |           |                  |          |
| 2    | 1.527         | 0.019                | 11.126        | 0.304                | 0.711 | 0.024        | 7.287     | 0.220            | 11.069   |
| 3    | 1.636         | 0.047                | 11.445        | 0.149                | 0.763 | 0.022        | 6.995     | 0.220            |          |
| 4    | 1.599         | 0.036                | 10.776        | 0.044                | 0.769 | 0.017        | 6.741     | 0.152            | -12.833  |
| 5    | 1.515         | 0.028                | 11.628        | 0.129                | 0.780 | 0.060        | 7.673     | 0.164            | 10.826   |
| 6    | 1.663         | 0.031                | 11.028        | 0.107                | 0.774 | 0.031        | 6.630     | 0.139            | -5.899   |
| 7    | 1.576         | 0.036                | 10.766        | 0.156                | 0.810 | 0.061        | 6.832     | 0.183            | 8.393    |
| 8    | 1.532         | 0.026                | 10.785        | 0.453                | 0.739 | 0.018        | 7.042     | 0.319            | -0.365   |
| 9    | 1.585         | 0.031                | 10.049        | 0.263                | 0.726 | 0.054        | 6.340     | 0.207            | 0.851    |
| 10   | 1.672         | 0.035                | 10.475        | 0.252                | 0.754 | 0.034        | 6.266     | 0.200            | -11.738  |
| 11   |               |                      |               |                      |       |              |           |                  |          |
| 12   | 1.621         | 0.029                | 11.005        | 0.229                | 0.751 | 0.018        | 6.790     | 0.187            | 0.426    |
| 13   | 1.573         | 0.045                | 11.054        | 1.540                | 0.808 | 0.041        | 7.028     | 0.999            | -2.919   |
| 14   | 1.688         | 0.054                | 10.681        | 0.460                | 0.736 | 0.010        | 6.329     | 0.339            | -13.319  |
| 15   | 1.460         | 0.021                | 9.922         | 0.093                | 0.770 | 0.035        | 6.796     | 0.116            | -2.494   |
| 16   | 1.563         | 0.022                | 10.415        | 0.267                | 0.741 | 0.034        | 6.664     | 0.196            | -12.954  |
| 17   | 1.569         | 0.029                | 10.339        | 0.264                | 0.763 | 0.029        | 6.588     | 0.207            | -7.298   |
| 18   | 1.493         | 0.028                | 10.588        | 0.142                | 0.729 | 0.036        | 7.092     | 0.161            |          |
| 19   | 1.582         | 0.043                | 11.494        | 0.398                | 0.770 | 0.030        | 7.263     | 0.321            | 5.839    |
| 20   | 1.630         | 0.049                | 11.497        | 0.408                | 0.781 | 0.032        | 7.055     | 0.328            | 5.230    |
| 21   | 1.645         | 0.025                | 11.731        | 0.127                | 0.755 | 0.024        | 7.130     | 0.135            | 2.189    |
| 22   | 1.532         | 0.040                | 11.432        | 0.029                | 0.779 | 0.010        | 7.465     | 0.198            | 10.643   |
| 23   | 1.562         | 0.040                | 11.158        | 0.042                | 0.725 | 0.005        | 7.144     | 0.184            | 8.150    |
| 24   | 1.611         | 0.036                | 11.396        | 0.636                | 0.740 | 0.022        | 7.073     | 0.425            | 3.953    |
| 25   | 1.553         | 0.027                | 11.154        | 1.139                | 0.744 | 0.023        | 7.073     | 0.425            | 3.284    |
| 26   | 1.649         | 0.018                | 11.839        | 0.107                | 0.756 | 0.009        | 7.181     | 0.103            | 12.407   |
| 27   | 1.584         | 0.038                | 11.559        | 0.229                | 0.761 | 0.038        | 7.299     | 0.226            | 12.772   |
|      |               |                      |               |                      |       |              |           |                  |          |
| 29   | 1.280         | 0.021                | 9.253         | 0.123                | 0.656 | 0.022        | 7.230     | 0.155            | 2.433    |
| 30   | 1.639         | 0.019                | 11.731        | 0.177                | 0.787 | 0.029        | 7.156     | 0.137            | -4.014   |

| Res. | $R_1(s^{-1})$ | $\Delta R_1(S^{-1})$ | $R_2(S^{-1})$ | $\Delta R_2(S^{-1})$ | NOE   | $\Delta$ NOE | $R_2/R_1$ | $\Delta R_2/R_1$ | RDC (Hz) |
|------|---------------|----------------------|---------------|----------------------|-------|--------------|-----------|------------------|----------|
| 31   | 1.601         | 0.017                | 10.403        | 0.186                | 0.772 | 0.004        | 6.497     | 0.135            | 9.548    |
| 32   | 1.584         | 0.040                | 11.216        | 0.139                | 0.707 | 0.067        | 7.083     | 0.199            | 9.366    |
| 33   | 1.580         | 0.031                | 11.125        | 0.940                | 0.739 | 0.041        | 7.042     | 0.610            |          |
| 34   | 1.501         | 0.022                | 10.738        | 0.115                | 0.772 | 0.014        | 7.152     | 0.128            |          |
| 35   |               |                      |               |                      |       |              |           |                  |          |
| 36   | 1.492         | 0.101                | 11.143        | 0.238                | 0.690 | 0.035        | 7.469     | 0.528            |          |
| 37   | 1.514         | 0.046                | 10.511        | 0.129                | 0.752 | 0.033        | 6.944     | 0.226            | 6.264    |
| 38   | 1.565         | 0.043                | 10.525        | 0.755                | 0.728 | 0.005        | 6.726     | 0.516            | -0.547   |
| 39   | 1.565         | 0.026                | 9.846         | 0.379                | 0.747 | 0.026        | 6.293     | 0.264            | -9.305   |
| 40   | 1.536         | 0.026                | 10.443        | 0.180                | 0.733 | 0.020        | 6.800     | 0.165            | -3.710   |
| 41   | 1.471         | 0.024                | 10.470        | 0.135                | 0.748 | 0.034        | 7.116     | 0.147            | 4.136    |
| 42   | 1.450         | 0.066                | 9.283         | 0.235                | 0.778 | 0.017        | 6.401     | 0.334            | 6.447    |
| 43   | 1.556         | 0.018                | 11.305        | 0.494                | 0.749 | 0.026        | 7.264     | 0.328            | 6.386    |
| 44   |               |                      |               |                      |       |              |           |                  |          |
| 45   | 1.606         | 0.022                | 10.749        | 0.139                | 0.820 | 0.010        | 6.692     | 0.125            | -12.224  |
| 46   | 1.609         | 0.020                | 12.593        | 0.325                | 0.761 | 0.036        | 7.827     | 0.223            | 2.372    |
| 47   | 1.574         | 0.030                | 10.785        | 0.036                | 0.765 | 0.012        | 6.854     | 0.132            | 0.669    |
| 48   | 1.489         | 0.026                | 10.631        | 0.119                | 0.743 | 0.041        | 7.141     | 0.148            | 0.851    |
| 49   | 1.525         | 0.012                | 11.009        | 0.172                | 0.761 | 0.043        | 7.222     | 0.126            |          |
| 50   |               |                      |               |                      |       |              |           |                  |          |
| 51   | 1.532         | 0.034                | 9.933         | 0.326                | 0.747 | 0.063        | 6.483     | 0.257            | -6.690   |
| 52   | 1.583         | 0.043                | 9.991         | 0.126                | 0.716 | 0.039        | 6.311     | 0.187            | 0.061    |
| 53   | 1.547         | 0.073                | 10.536        | 0.218                | 0.744 | 0.036        | 6.810     | 0.350            |          |
| 54   | 1.631         | 0.040                | 9.321         | 0.376                | 0.730 | 0.014        | 5.714     | 0.269            | -12.164  |
| 55   | 1.532         | 0.030                | 9.885         | 0.080                | 0.725 | 0.003        | 6.451     | 0.137            | -12.893  |
| 56   | 1.621         | 0.030                | 10.563        | 0.203                | 0.763 | 0.035        | 6.515     | 0.174            | -0.547   |
| 57   | 1.575         | 0.032                | 10.680        | 0.173                | 0.714 | 0.060        | 6.780     | 0.176            |          |
| 58   | 1.561         | 0.015                | 10.292        | 0.517                | 0.790 | 0.015        | 6.594     | 0.337            | 12.589   |
| 59   |               |                      |               |                      |       |              |           |                  | 10.157   |
| 60   | 1.545         | 0.020                | 10.698        | 0.097                | 0.752 | 0.007        | 6.923     | 0.109            | 6.325    |
| 61   | 1.605         | 0.032                | 10.889        | 0.473                | 0.759 | 0.018        | 6.786     | 0.324            | -0.426   |
| 62   | 1.724         | 0.038                | 10.685        | 1.284                | 0.717 | 0.026        | 6.199     | 0.757            | -12.042  |
| 63   |               |                      |               |                      |       |              |           |                  |          |
| 64   | 1.667         | 0.048                | 9.759         | 1.174                | 0.668 | 0.026        | 5.855     | 0.724            | -5.595   |
| 65   | 1.560         | 0.032                | 8.369         | 0.167                | 0.659 | 0.008        | 5.365     | 0.153            | 2.189    |
| 66   | 1.479         | 0.018                | 9.906         | 0.067                | 0.693 | 0.019        | 6.697     | 0.091            | -1.034   |
| 67   | 1.563         | 0.033                | 10.291        | 0.632                | 0.743 | 0.032        | 6.583     | 0.428            | 4.744    |

| Res. | $R_1(s^{-1})$ | $\Delta R_1(S^{-1})$ | $R_2(S^{-1})$ | $\Delta R_2(S^{-1})$ | NOE   | $\Delta$ NOE | $R_2/R_1$ | $\Delta R_2/R_1$ | RDC (Hz) |
|------|---------------|----------------------|---------------|----------------------|-------|--------------|-----------|------------------|----------|
| 68   | 1.540         | 0.033                | 10.955        | 1.727                | 0.770 | 0.059        | 7.116     | 1.131            | 4.014    |
| 69   |               |                      |               |                      |       |              |           |                  | -4.865   |
| 70   | 1.602         | 0.024                | 10.807        | 0.467                | 0.759 | 0.003        | 6.748     | 0.308            | 12.407   |
| 71   |               |                      |               |                      |       |              |           |                  |          |
| 72   | 1.638         | 0.034                | 10.995        | 0.557                | 0.771 | 0.034        | 6.713     | 0.368            | -0.669   |
| 73   | 1.637         | 0.042                | 11.235        | 0.174                | 0.767 | 0.029        | 6.865     | 0.204            | 2.737    |
| 74   | 1.541         | 0.037                | 11.237        | 0.950                | 0.770 | 0.045        | 7.294     | 0.641            | 5.717    |
| 75   | 1.580         | 0.022                | 10.443        | 0.145                | 0.749 | 0.024        | 6.611     | 0.130            | 1.703    |
| 76   | 1.682         | 0.019                | 10.928        | 0.394                | 0.762 | 0.024        | 6.496     | 0.245            | -7.785   |
| 77   | 1.641         | 0.015                | 10.441        | 0.086                | 0.769 | 0.014        | 6.363     | 0.079            | -12.529  |
| 78   | 1.672         | 0.033                | 10.692        | 0.274                | 0.715 | 0.021        | 6.395     | 0.207            | 2.250    |
| 79   | 1.622         | 0.028                | 10.287        | 0.077                | 0.699 | 0.036        | 6.341     | 0.120            | 1.338    |
| 80   | 1.511         | 0.026                | 9.427         | 0.733                | 0.722 | 0.025        | 6.238     | 0.497            | -12.893  |
| 81   |               |                      |               |                      |       |              |           |                  |          |
| 82   | 1.624         | 0.025                | 9.911         | 0.242                | 0.739 | 0.030        | 6.102     | 0.176            | -12.529  |
| 83   | 1.554         | 0.028                | 10.033        | 0.403                | 0.771 | 0.018        | 6.455     | 0.284            | -7.724   |
| 84   | 1.621         | 0.045                | 10.692        | 0.188                | 0.739 | 0.018        | 6.597     | 0.216            | 9.792    |
| 85   | 1.615         | 0.023                | 11.396        | 0.072                | 0.783 | 0.047        | 7.055     | 0.109            | 3.467    |
| 86   | 1.595         | 0.020                | 11.446        | 0.033                | 0.799 | 0.023        | 7.176     | 0.092            | 11.616   |
| 87   | 1.563         | 0.030                | 11.295        | 0.261                | 0.779 | 0.014        | 7.227     | 0.217            | 3.223    |
| 88   | 1.532         | 0.031                | 10.403        | 0.110                | 0.751 | 0.020        | 6.791     | 0.154            | 4.014    |
| 89   | 1.565         | 0.047                | 10.615        | 0.096                | 0.757 | 0.007        | 6.783     | 0.214            | 7.541    |
| 90   |               |                      |               |                      |       |              |           |                  |          |
| 91   | 1.654         | 0.037                | 11.297        | 0.069                | 0.771 | 0.011        | 6.832     | 0.160            | 2.433    |
| 92   | 1.526         | 0.020                | 9.920         | 0.087                | 0.715 | 0.022        | 6.502     | 0.104            | -9.792   |
| 93   |               |                      |               |                      |       |              |           |                  |          |
| 94   | 1.656         | 0.027                | 11.237        | 0.422                | 0.762 | 0.029        | 6.787     | 0.278            | -8.393   |
| 95   |               |                      |               |                      |       |              |           |                  |          |
| 96   | 1.553         | 0.038                | 10.934        | 0.290                | 0.796 | 0.044        | 7.040     | 0.254            | 3.102    |
| 97   | 1.649         | 0.036                | 9.711         | 0.440                | 0.738 | 0.043        | 5.888     | 0.296            | -2.068   |
| 98   | 1.462         | 0.021                | 9.669         | 0.163                | 0.690 | 0.013        | 6.615     | 0.146            | 11.555   |
| 99   | 1.489         | 0.041                | 9.678         | 0.097                | 0.631 | 0.006        | 6.498     | 0.189            |          |
| 100  | 1.427         | 0.035                | 9.126         | 0.535                | 0.645 | 0.005        | 6.395     | 0.406            | 8.879    |
| 101  | 1.620         | 0.027                | 10.706        | 0.647                | 0.744 | 0.012        | 6.609     | 0.414            | 8.210    |
| 403  | 1.586         | 0.023                | 10.317        | 0.106                | 0.701 | 0.006        | 6.504     | 0.117            | -5.595   |
| 404  | 1.494         | 0.030                | 9.805         | 0.234                | 0.636 | 0.017        | 6.565     | 0.205            | 3.710    |
| 405  |               |                      |               |                      |       |              |           |                  |          |

| Res. | $R_1(s^{-1})$ | $\Delta R_1(S^{-1})$ | $R_2(S^{-1})$ | $\Delta R_2(S^{-1})$ | NOE   | $\Delta$ NOE | $R_2/R_1$ | $\Delta R_2/R_1$ | RDC (Hz) |
|------|---------------|----------------------|---------------|----------------------|-------|--------------|-----------|------------------|----------|
| 406  | 1.459         | 0.032                | 9.912         | 0.157                | 0.673 | 0.032        | 6.793     | 0.182            | -0.365   |
| 407  | 1.499         | 0.016                | 10.192        | 0.089                | 0.696 | 0.046        | 6.800     | 0.093            | -5.109   |
| 408  | 1.471         | 0.024                | 9.249         | 0.142                | 0.584 | 0.032        | 6.288     | 0.142            | -10.339  |
| 409  | 1.636         | 0.036                | 10.499        | 0.162                | 0.716 | 0.030        | 6.419     | 0.171            | -12.833  |
| 410  | 1.581         | 0.015                | 11.261        | 0.764                | 0.755 | 0.015        | 7.124     | 0.488            | 5.717    |
| 411  | 1.530         | 0.032                | 10.757        | 0.081                | 0.711 | 0.002        | 7.029     | 0.157            | 12.042   |
| 412  | 1.473         | 0.019                | 9.497         | 0.453                | 0.749 | 0.017        | 6.449     | 0.318            | 10.765   |
| 413  | 1.557         | 0.043                | 11.208        | 1.296                | 0.740 | 0.024        | 7.197     | 0.855            | 11.130   |
| 414  |               |                      |               |                      |       |              |           |                  |          |
| 415  | 1.461         | 0.032                | 9.420         | 0.100                | 0.725 | 0.014        | 6.446     | 0.158            | -1.885   |
| 416  | 1.622         | 0.036                | 10.974        | 0.094                | 0.781 | 0.008        | 6.766     | 0.159            | 8.150    |
| 417  | 1.516         | 0.024                | 10.058        | 0.155                | 0.715 | 0.002        | 6.636     | 0.147            | 1.034    |
| 418  | 1.597         | 0.037                | 9.765         | 0.087                | 0.746 | 0.005        | 6.114     | 0.150            | -14.292  |
| 419  | 1.566         | 0.028                | 10.327        | 0.261                | 0.696 | 0.023        | 6.596     | 0.205            | -2.554   |
| 420  | 1.599         | 0.018                | 10.420        | 0.148                | 0.755 | 0.025        | 6.518     | 0.119            | -3.163   |
| 421  | 1.526         | 0.026                | 10.682        | 0.142                | 0.715 | 0.006        | 7.000     | 0.150            |          |
| 422  | 1.557         | 0.019                | 10.551        | 0.112                | 0.772 | 0.010        | 6.775     | 0.109            | 3.406    |
| 423  | 1.499         | 0.019                | 10.735        | 0.189                | 0.732 | 0.035        | 7.161     | 0.155            | 0.304    |
| 424  | 1.468         | 0.020                | 10.738        | 0.088                | 0.704 | 0.054        | 7.316     | 0.115            | -1.825   |
| 425  | 1.572         | 0.048                | 11.698        | 0.455                | 0.697 | 0.053        | 7.439     | 0.367            | -0.061   |
| 426  | 1.668         | 0.035                | 13.922        | 1.701                | 0.799 | 0.032        | 8.349     | 1.035            | -10.52   |
| 427  |               |                      |               |                      |       |              |           |                  |          |
| 428  | 1.585         | 0.044                | 21.728        | 0.669                | 0.693 | 0.067        | 13.707    | 0.567            | -4.44    |
| 429  |               |                      |               |                      |       |              |           |                  |          |
| 430  | 1.583         | 0.209                | 27.638        | 2.646                | 0.820 | 0.015        | 17.457    | 2.846            | 10.157   |
| 431  | 1.602         | 0.034                | 10.856        | 0.152                | 0.771 | 0.019        | 6.776     | 0.171            | 11.069   |
| 432  | 1.484         | 0.036                | 10.789        | 0.055                | 0.755 | 0.028        | 7.273     | 0.178            | 8.940    |
| 433  | 1.592         | 0.028                | 11.275        | 1.794                | 0.798 | 0.050        | 7.080     | 1.133            | -1.277   |
| 434  | 1.585         | 0.027                | 11.498        | 0.349                | 0.839 | 0.015        | 7.254     | 0.252            | 2.007    |
| 435  | 1.524         | 0.051                | 11.375        | 1.689                | 0.788 | 0.026        | 7.465     | 1.136            | 8.819    |
| 436  | 1.624         | 0.019                | 11.257        | 0.314                | 0.759 | 0.024        | 6.932     | 0.209            | 0.547    |
| 437  | 1.589         | 0.026                | 10.719        | 0.134                | 0.825 | 0.020        | 6.745     | 0.139            | 5.352    |
| 438  | 1.666         | 0.024                | 11.818        | 0.310                | 0.790 | 0.022        | 7.094     | 0.212            | 4.561    |
| 439  |               |                      |               |                      |       |              |           |                  |          |
| 440  | 1.630         | 0.022                | 12.895        | 0.450                | 0.783 | 0.020        | 7.910     | 0.296            | -1.216   |

**10. Table S5. Model-free analysis results for  $\Delta\Delta\text{Ihh-V67CM}$  and  $\Delta\Delta\text{Ihh-L67CM}$  using relaxation data acquired at 600 MHz NMR.**

|                                                        | $\Delta\Delta\text{Ihh-V67CM}$                                      | $\Delta\Delta\text{Ihh-L67CM}$                            |
|--------------------------------------------------------|---------------------------------------------------------------------|-----------------------------------------------------------|
| Total analyzed                                         | 120 residues                                                        | 120 residues                                              |
| Model 1: $S^2$ ( $\tau_e=0$ , $R_{ex}=0$ , $S_f^2=1$ ) | 81 residues                                                         | 81 residues                                               |
| Model 2: $S^2$ , $\tau_e$ ( $R_{ex}=0$ , $S_f^2=1$ )   | 19 residues                                                         | 25 residues                                               |
| Model 3: $S^2$ , $R_{ex}$ ( $\tau_e=0$ , $S_f^2=1$ )   | 9 residues<br>G5, R18, E20, R26, F49, E426,<br>T430, A433, and V438 | 7 residues<br>G5, H30, V46, E424, L428,<br>T430, and N440 |
| Model 4: $S^2$ , $\tau_e$ , $R_{ex}$ ( $S_f^2=1$ )     | 6 residues<br>K27, I29, R92, R419, E424, and<br>L428                | 0 residues                                                |
| Model 5: $S^2$ , $\tau_e$ , $S_f^2$ ( $R_{ex}=0$ )     | 2 residues<br>G64 and A65                                           | 4 residues<br>R54, G65, T100, and A418                    |
| Unassigned                                             | 3 residues: H30, V98, R405                                          | 3 residues: V23, T77, Y79                                 |
| $\tau_m$                                               | 7.70 ns                                                             | 7.77 ns                                                   |
| $D_{\parallel}/D_{\perp}$                              | 0.86                                                                | 0.96                                                      |
| $S^2$ (Ave)                                            | 0.89±0.01                                                           | 0.89±0.01                                                 |

**11. Model-free results for  $\Delta\Delta I_{hh}$ -V67CM and  $\Delta\Delta I_{hh}$ -L67CM. (Table S6);**

Secondary structure elements are given in the column marked “2°”. Model “0” indicates that no model was deemed appropriate for the data. Residues that not analyzed include residues that were not assigned due to severe exchange broadening (“X”), praline residues (“P”), and spectral overlap (“OL”). All relaxation data were acquired at 298 K, pH 7.0.

**Table S6a;  $\Delta\Delta I_{hh}$ -V67CM**

| res | 2°       | Model | S <sup>2</sup> | S <sup>2</sup> <sub>err</sub> | S <sub>2f</sub> | $\tau_e$ (ps) | R <sub>ex</sub> (s <sup>-1</sup> ) |
|-----|----------|-------|----------------|-------------------------------|-----------------|---------------|------------------------------------|
| 1   | $\beta$  | X     |                |                               |                 |               |                                    |
| 2   | $\beta$  | 1     | 0.91           | 0.02                          |                 |               |                                    |
| 3   | $\beta$  | 1     | 0.93           | 0.01                          |                 |               |                                    |
| 4   | $\beta$  | 1     | 0.93           | 0.01                          |                 |               |                                    |
| 5   |          | 3     | 0.89           | 0.02                          |                 |               | 1.36±0.22                          |
| 6   | $\beta$  | 1     | 0.94           | 0.01                          |                 |               |                                    |
| 7   | $\beta$  | 1     | 0.93           | 0.02                          |                 |               |                                    |
| 8   | $\beta$  | 1     | 0.88           | 0.01                          |                 |               |                                    |
| 9   | $\beta$  | 1     | 0.92           | 0.03                          |                 |               |                                    |
| 10  | $\beta$  | 1     | 0.92           | 0.01                          |                 |               |                                    |
| 11  |          | P     |                |                               |                 |               |                                    |
| 12  |          | 2     | 0.93           | 0.01                          |                 | 108±139       |                                    |
| 13  |          | 1     | 0.91           | 0.01                          |                 |               |                                    |
| 14  |          | 1     | 0.93           | 0.01                          |                 |               |                                    |
| 15  | $\beta$  | OL    |                |                               |                 |               |                                    |
| 16  | $\beta$  | 1     | 0.91           | 0.01                          |                 |               |                                    |
| 17  | $\beta$  | 1     | 0.86           | 0.02                          |                 |               |                                    |
| 18  | $\beta$  | 3     | 0.85           | 0.01                          |                 |               | 1.05±0.21                          |
| 19  | $\beta$  | 2     | 0.92           | 0.01                          |                 | 65±12         |                                    |
| 20  | $\alpha$ | 3     | 0.91           | 0.01                          |                 |               | 1.07±0.25                          |
| 21  | $\alpha$ | 1     | 0.96           | 0.01                          |                 |               |                                    |
| 22  | $\alpha$ | 1     | 0.94           | 0.01                          |                 |               |                                    |
| 23  | $\alpha$ | OL    |                |                               |                 |               |                                    |
| 24  | $\alpha$ | 1     | 0.93           | 0.01                          |                 |               |                                    |
| 25  | $\alpha$ | 1     | 0.94           | 0.02                          |                 |               |                                    |
| 26  |          | 3     | 0.94           | 0.01                          |                 |               | 0.65±0.24                          |
| 27  |          | 4     | 0.88           | 0.01                          |                 | 29±5          | 1.12±0.17                          |
| 28  |          | P     |                |                               |                 |               |                                    |
| 29  | $\beta$  | 4     | 0.74           | 0.01                          |                 | 30±5          | 0.64±0.19                          |
| 30  | $\beta$  | 0     |                |                               |                 |               |                                    |
| 31  | $\beta$  | 1     | 0.91           | 0.01                          |                 |               |                                    |
| 32  | $\beta$  | 1     | 0.93           | 0.01                          |                 |               |                                    |
| 33  | $\beta$  | 2     | 0.88           | 0.01                          |                 | 103±41        |                                    |
| 34  | $\beta$  | 1     | 0.91           | 0.02                          |                 |               |                                    |
| 35  | $\beta$  | OL    |                |                               |                 |               |                                    |
| 36  |          | 1     | 0.88           | 0.02                          |                 |               |                                    |
| 37  |          | 1     | 0.89           | 0.01                          |                 |               |                                    |
| 38  |          | 2     | 0.91           | 0.01                          |                 | 45±8          |                                    |
| 39  | $\beta$  | 1     | 0.88           | 0.01                          |                 |               |                                    |
| 40  | $\beta$  | 1     | 0.90           | 0.01                          |                 |               |                                    |
| 41  | $\beta$  | 1     | 0.87           | 0.01                          |                 |               |                                    |
| 42  | $\beta$  | 2     | 0.83           | 0.02                          |                 | 34±14         |                                    |
| 43  | $\beta$  | 1     | 0.92           | 0.01                          |                 |               |                                    |



| res | 2° | Model | S <sup>2</sup> | S <sup>2</sup> err | S <sub>2f</sub> | τ <sub>e</sub> (ps) | R <sub>ex</sub> (s <sup>-1</sup> ) |
|-----|----|-------|----------------|--------------------|-----------------|---------------------|------------------------------------|
| 44  | β  | P     |                |                    |                 |                     |                                    |
| 45  | β  | 1     | 0.92           | 0.01               |                 |                     |                                    |
| 46  | β  | 1     | 1.00           | 0.01               |                 |                     |                                    |
| 47  | β  | 1     | 0.90           | 0.01               |                 |                     |                                    |
| 48  | β  | 1     | 0.89           | 0.01               |                 |                     |                                    |
| 49  | β  | 3     | 0.87           | 0.01               |                 |                     | 0.50±0.21                          |
| 50  | β  | 1     | 0.88           | 0.02               |                 |                     |                                    |
| 51  | β  | 2     | 0.83           | 0.02               |                 | 67±29               |                                    |
| 52  | β  | 2     | 0.86           | 0.01               |                 | 56±22               |                                    |
| 53  | β  | 2     | 0.89           | 0.01               |                 | 65±10               |                                    |
| 54  | β  | 1     | 0.89           | 0.01               |                 |                     |                                    |
| 55  | β  | 1     | 0.88           | 0.01               |                 |                     |                                    |
| 56  | β  | 1     | 0.92           | 0.01               |                 |                     |                                    |
| 57  | β  | OL    |                |                    |                 |                     |                                    |
| 58  | β  | 1     | 0.90           | 0.00               |                 |                     |                                    |
| 59  | β  | 1     | 0.88           | 0.01               |                 |                     |                                    |
| 60  | β  | 1     | 0.91           | 0.01               |                 |                     |                                    |
| 61  | β  | 1     | 0.90           | 0.01               |                 |                     |                                    |
| 62  | β  | 1     | 0.95           | 0.01               |                 |                     |                                    |
| 63  |    | X     |                |                    |                 |                     |                                    |
| 64  |    | 5     | 0.76           | 0.01               | 0.90±0.01       | 1165±114            |                                    |
| 65  | β  | 5     | 0.68           | 0.01               | 0.85±0.01       | 1249±265            |                                    |
| 66  | β  | 1     | 0.85           | 0.01               |                 |                     |                                    |
| 67  | β  | 1     | 0.93           | 0.01               |                 |                     |                                    |
| 68  | β  | 2     | 0.87           | 0.03               |                 | 56±357              |                                    |
| 69  | β  | 1     | 0.89           | 0.01               |                 |                     |                                    |
| 70  | β  | 2     | 0.91           | 0.01               |                 | 66±33               |                                    |
| 71  |    | P     |                |                    |                 |                     |                                    |
| 72  |    | 1     | 0.93           | 0.01               |                 |                     |                                    |
| 73  | β  | 1     | 0.96           | 0.01               |                 |                     |                                    |
| 74  | β  | 1     | 0.89           | 0.01               |                 |                     |                                    |
| 75  | β  | 1     | 0.88           | 0.01               |                 |                     |                                    |
| 76  | β  | 1     | 0.95           | 0.01               |                 |                     |                                    |
| 77  | β  | 1     | 0.92           | 0.01               |                 |                     |                                    |
| 78  | β  | 1     | 0.92           | 0.01               |                 |                     |                                    |
| 79  |    | 1     | 0.90           | 0.01               |                 |                     |                                    |
| 80  | β  | 2     | 0.82           | 0.01               |                 | 51±10               |                                    |
| 81  | β  | OL    |                |                    |                 |                     |                                    |
| 82  | β  | 1     | 0.88           | 0.01               |                 |                     |                                    |
| 83  | β  | 1     | 0.85           | 0.01               |                 |                     |                                    |
| 84  | β  | 2     | 0.92           | 0.02               |                 | 82±129              |                                    |
| 85  |    | 2     | 0.90           | 0.01               |                 | 52±9                |                                    |
| 86  |    | 1     | 0.97           | 0.01               |                 |                     |                                    |
| 87  |    | 1     | 0.95           | 0.01               |                 |                     |                                    |
| 88  |    | 1     | 0.90           | 0.02               |                 |                     |                                    |
| 89  |    | 1     | 0.89           | 0.01               |                 |                     |                                    |
| 90  |    | OL    |                |                    |                 |                     |                                    |
| 91  | β  | 1     | 0.96           | 0.01               |                 |                     |                                    |
| 92  | β  | 4     | 0.81           | 0.01               |                 | 52±9                | 0.57±0.14                          |
| 93  | β  | OL    |                |                    |                 |                     |                                    |
| 94  | β  | 1     | 0.92           | 0.01               |                 |                     |                                    |
| 95  | β  | OL    |                |                    |                 |                     |                                    |

| res | 2° | Model | S <sup>2</sup> | S <sup>2</sup> err | S <sub>2f</sub> | τ <sub>e</sub> (ps) | R <sub>ex</sub> (s <sup>-1</sup> ) |
|-----|----|-------|----------------|--------------------|-----------------|---------------------|------------------------------------|
| 96  | β  | 1     | 0.92           | 0.01               |                 |                     |                                    |
| 97  | β  | 2     | 0.92           | 0.02               |                 | 117±157             |                                    |
| 98  |    | 0     |                |                    |                 |                     |                                    |
| 99  |    | 2     | 0.82           | 0.01               |                 | 66±7                |                                    |
| 100 |    | 2     | 0.80           | 0.01               |                 | 57±10               |                                    |
| 101 |    | 1     | 0.93           | 0.01               |                 |                     |                                    |
| 403 | β  | 1     | 0.88           | 0.01               |                 |                     |                                    |
| 404 | β  | 2     | 0.81           | 0.01               |                 | 74±13               |                                    |
| 405 | β  | 0     |                |                    |                 |                     |                                    |
| 406 | β  | OL    |                |                    |                 |                     |                                    |
| 407 | β  | 1     | 0.88           | 0.01               |                 |                     |                                    |
| 408 | β  | 1     | 0.82           | 0.01               |                 |                     |                                    |
| 409 | β  | 1     | 0.90           | 0.01               |                 |                     |                                    |
| 410 | β  | 2     | 0.90           | 0.02               |                 | 86±54               |                                    |
| 411 | β  | OL    |                |                    |                 |                     |                                    |
| 412 | β  | 1     | 0.85           | 0.01               |                 |                     |                                    |
| 413 | β  | 1     | 0.88           | 0.01               |                 |                     |                                    |
| 414 |    | P     |                |                    |                 |                     |                                    |
| 415 |    | 1     | 0.82           | 0.01               |                 |                     |                                    |
| 416 | β  | 1     | 0.94           | 0.02               |                 |                     |                                    |
| 417 | β  | 1     | 0.88           | 0.01               |                 |                     |                                    |
| 418 | β  | 1     | 0.86           | 0.01               |                 |                     |                                    |
| 419 | β  | 4     | 0.83           | 0.01               |                 | 40±9                | 0.78±0.16                          |
| 420 | β  | 2     | 0.89           | 0.01               |                 | 58±20               |                                    |
| 421 | β  | OL    |                |                    |                 |                     |                                    |
| 422 | β  | 1     | 0.89           | 0.01               |                 |                     |                                    |
| 423 | β  | 1     | 0.88           | 0.01               |                 |                     |                                    |
| 424 | β  | 4     | 0.81           | 0.01               |                 | 43±11               | 1.00±0.21                          |
| 425 | β  | 1     | 0.89           | 0.01               |                 |                     |                                    |
| 426 | β  | 3     | 0.92           | 0.01               |                 |                     | 1.45±0.33                          |
| 427 |    | 1     | 0.90           | 0.01               |                 |                     |                                    |
| 428 |    | 4     | 0.80           | 0.03               |                 | 29±12               | 10.72±0.62                         |
| 429 | β  | X     |                |                    |                 |                     |                                    |
| 430 | β  | 3     | 1.00           | 0.08               |                 |                     | 14.25±2.20                         |
| 431 | β  | 1     | 0.92           | 0.01               |                 |                     |                                    |
| 432 | β  | 1     | 0.88           | 0.01               |                 |                     |                                    |
| 433 | β  | 3     | 0.89           | 0.01               |                 |                     | 1.42±0.51                          |
| 434 |    | 1     | 0.95           | 0.01               |                 |                     |                                    |
| 435 | β  | 1     | 0.89           | 0.02               |                 |                     |                                    |
| 436 | β  | 1     | 0.93           | 0.01               |                 |                     |                                    |
| 437 | β  | 1     | 0.92           | 0.01               |                 |                     |                                    |
| 438 | β  | 3     | 0.92           | 0.01               |                 |                     | 0.94±0.19                          |
| 439 | β  | 1     | 0.96           | 0.01               |                 |                     |                                    |
| 440 | β  | 1     | 0.95           | 0.01               |                 |                     |                                    |

**Table S6b: ΔIhh-L67CM**

| res | 2° | Model | S <sup>2</sup> | S <sup>2</sup> err | S <sub>2f</sub> | τ <sub>e</sub> (ps) | R <sub>ex</sub> (s <sup>-1</sup> ) |
|-----|----|-------|----------------|--------------------|-----------------|---------------------|------------------------------------|
| 1   | β  | X     |                |                    |                 |                     |                                    |
| 2   | β  | 1     | 0.90           | 0.01               |                 |                     |                                    |
| 3   | β  | 1     | 0.95           | 0.01               |                 |                     |                                    |
| 4   | β  | 1     | 0.90           | 0.00               |                 |                     |                                    |
| 5   |    | 3     | 0.88           | 0.02               |                 |                     | 1.06±0.25                          |

| res | 2° | Model | S <sup>2</sup> | S <sup>2</sup> err | S <sub>2f</sub> | τ <sub>e</sub> (ps) | R <sub>ex</sub> (s <sup>-1</sup> ) |
|-----|----|-------|----------------|--------------------|-----------------|---------------------|------------------------------------|
| 6   | β  | 1     | 0.93           | 0.01               |                 |                     |                                    |
| 7   | β  | 1     | 0.90           | 0.01               |                 |                     |                                    |
| 8   | β  | 1     | 0.89           | 0.01               |                 |                     |                                    |
| 9   | β  | 1     | 0.89           | 0.01               |                 |                     |                                    |
| 10  | β  | 1     | 0.93           | 0.02               |                 |                     |                                    |
| 11  |    | P     |                |                    |                 |                     |                                    |
| 12  |    | 1     | 0.93           | 0.01               |                 |                     |                                    |
| 13  |    | 1     | 0.91           | 0.03               |                 |                     |                                    |
| 14  |    | 2     | 0.94           | 0.03               |                 | 698±364             |                                    |
| 15  | β  | 1     | 0.84           | 0.01               |                 |                     |                                    |
| 16  | β  | 1     | 0.89           | 0.01               |                 |                     |                                    |
| 17  | β  | 1     | 0.89           | 0.01               |                 |                     |                                    |
| 18  | β  | 1     | 0.88           | 0.01               |                 |                     |                                    |
| 19  | β  | 1     | 0.93           | 0.02               |                 |                     |                                    |
| 20  | α  | 1     | 0.95           | 0.02               |                 |                     |                                    |
| 21  | α  | 1     | 0.97           | 0.01               |                 |                     |                                    |
| 22  | α  | 1     | 0.95           | 0.00               |                 |                     |                                    |
| 23  | α  | 0     |                |                    |                 |                     |                                    |
| 24  | α  | 1     | 0.94           | 0.02               |                 |                     |                                    |
| 25  | α  | 1     | 0.91           | 0.02               |                 |                     |                                    |
| 26  |    | 1     | 0.98           | 0.01               |                 |                     |                                    |
| 27  |    | 1     | 0.95           | 0.01               |                 |                     |                                    |
| 28  |    | P     |                |                    |                 |                     |                                    |
| 29  | β  | 1     | 0.76           | 0.01               |                 |                     |                                    |
| 30  | β  | 3     | 0.94           | 0.01               |                 |                     | 0.68±0.23                          |
| 31  | β  | 2     | 0.90           | 0.01               |                 | 34±6                |                                    |
| 32  | β  | 1     | 0.94           | 0.01               |                 |                     |                                    |
| 33  | β  | 1     | 0.92           | 0.02               |                 |                     |                                    |
| 34  | β  | 1     | 0.89           | 0.01               |                 |                     |                                    |
| 35  | β  | OL    |                |                    |                 |                     |                                    |
| 36  |    | 1     | 0.92           | 0.02               |                 |                     |                                    |
| 37  |    | 1     | 0.88           | 0.01               |                 |                     |                                    |
| 38  |    | 2     | 0.89           | 0.02               |                 | 55±16               |                                    |
| 39  | β  | 1     | 0.89           | 0.01               |                 |                     |                                    |
| 40  | β  | 1     | 0.88           | 0.01               |                 |                     |                                    |
| 41  | β  | 1     | 0.87           | 0.01               |                 |                     |                                    |
| 42  | β  | 1     | 0.79           | 0.02               |                 |                     |                                    |
| 43  | β  | 1     | 0.90           | 0.01               |                 |                     |                                    |
| 44  | β  | P     |                |                    |                 |                     |                                    |
| 45  | β  | 1     | 0.92           | 0.01               |                 |                     |                                    |
| 46  | β  | 3     | 0.93           | 0.01               |                 |                     | 1.47±0.35                          |
| 47  | β  | 1     | 0.90           | 0.00               |                 |                     |                                    |
| 48  | β  | 1     | 0.88           | 0.01               |                 |                     |                                    |
| 49  | β  | 1     | 0.89           | 0.01               |                 |                     |                                    |
| 50  | β  | OL    |                |                    |                 |                     |                                    |
| 51  | β  | 1     | 0.87           | 0.02               |                 |                     |                                    |
| 52  | β  | 1     | 0.85           | 0.01               |                 |                     |                                    |
| 53  | β  | 1     | 0.88           | 0.02               |                 |                     |                                    |
| 54  | β  | 5     | 0.75           | 0.05               | 0.88±0.03       | 1697±1550           |                                    |
| 55  | β  | 2     | 0.84           | 0.01               |                 | 38±3                |                                    |
| 56  | β  | 1     | 0.91           | 0.01               |                 |                     |                                    |
| 57  | β  | 1     | 0.90           | 0.01               |                 |                     |                                    |

| res | 2° | Model | S <sup>2</sup> | S <sup>2</sup> err | S <sub>2f</sub> | τ <sub>e</sub> (ps) | R <sub>ex</sub> (s <sup>-1</sup> ) |
|-----|----|-------|----------------|--------------------|-----------------|---------------------|------------------------------------|
| 58  | β  | 1     | 0.91           | 0.01               |                 |                     |                                    |
| 59  | β  | OL    |                |                    |                 |                     |                                    |
| 60  | β  | 2     | 0.89           | 0.01               |                 | 40±9                |                                    |
| 61  | β  | 1     | 0.93           | 0.02               |                 |                     |                                    |
| 62  | β  | 1     | 0.98           | 0.02               |                 |                     |                                    |
| 63  |    | X     |                |                    |                 |                     |                                    |
| 64  |    | 1     | 0.95           | 0.03               |                 |                     |                                    |
| 65  | β  | 5     | 0.65           | 0.02               | 0.84±0.01       | 1478±137            |                                    |
| 66  | β  | 2     | 0.83           | 0.01               |                 | 49±13               |                                    |
| 67  | β  | 1     | 0.90           | 0.02               |                 |                     |                                    |
| 68  | β  | 1     | 0.89           | 0.02               |                 |                     |                                    |
| 69  | β  | X     |                |                    |                 |                     |                                    |
| 70  | β  | 2     | 0.92           | 0.01               |                 | 51±13               |                                    |
| 71  |    | P     |                |                    |                 |                     |                                    |
| 72  |    | 1     | 0.95           | 0.02               |                 |                     |                                    |
| 73  | β  | 1     | 0.95           | 0.01               |                 |                     |                                    |
| 74  | β  | 1     | 0.90           | 0.02               |                 |                     |                                    |
| 75  | β  | 2     | 0.88           | 0.01               |                 | 55±23               |                                    |
| 76  | β  | 1     | 0.96           | 0.01               |                 |                     |                                    |
| 77  | β  | 0     |                |                    |                 |                     |                                    |
| 78  | β  | 1     | 0.94           | 0.02               |                 |                     |                                    |
| 79  |    | 0     |                |                    |                 |                     |                                    |
| 80  | β  | 2     | 0.84           | 0.02               |                 | 43±19               |                                    |
| 81  | β  | OL    |                |                    |                 |                     |                                    |
| 82  | β  | 1     | 0.90           | 0.01               |                 |                     |                                    |
| 83  | β  | 1     | 0.89           | 0.01               |                 |                     |                                    |
| 84  | β  | 1     | 0.91           | 0.01               |                 |                     |                                    |
| 85  |    | 1     | 0.95           | 0.01               |                 |                     |                                    |
| 86  |    | 1     | 0.95           | 0.00               |                 |                     |                                    |
| 87  |    | 1     | 0.92           | 0.01               |                 |                     |                                    |
| 88  |    | 1     | 0.87           | 0.01               |                 |                     |                                    |
| 89  |    | 2     | 0.88           | 0.01               |                 | 37±8                |                                    |
| 90  |    | OL    |                |                    |                 |                     |                                    |
| 91  | β  | 1     | 0.94           | 0.01               |                 |                     |                                    |
| 92  | β  | 2     | 0.84           | 0.01               |                 | 52±16               |                                    |
| 93  | β  | OL    |                |                    |                 |                     |                                    |
| 94  | β  | 1     | 0.95           | 0.01               |                 |                     |                                    |
| 95  | β  | OL    |                |                    |                 |                     |                                    |
| 96  | β  | 1     | 0.91           | 0.02               |                 |                     |                                    |
| 97  | β  | 1     | 0.92           | 0.02               |                 |                     |                                    |
| 98  |    | 2     | 0.81           | 0.01               |                 | 46±8                |                                    |
| 99  |    | 2     | 0.81           | 0.01               |                 | 62±5                |                                    |
| 100 |    | 5     | 0.75           | 0.03               | 0.84±0.02       | 640±192             |                                    |
| 101 |    | 2     | 0.92           | 0.02               |                 | 68±29               |                                    |
| 403 | β  | 2     | 0.87           | 0.01               |                 | 65±8                |                                    |
| 404 | β  | 2     | 0.82           | 0.01               |                 | 68±13               |                                    |
| 405 | β  | OL    |                |                    |                 |                     |                                    |
| 406 | β  | 2     | 0.82           | 0.01               |                 | 50±21               |                                    |
| 407 | β  | 1     | 0.86           | 0.01               |                 |                     |                                    |
| 408 | β  | 2     | 0.78           | 0.01               |                 | 82±17               |                                    |
| 409 | β  | 2     | 0.89           | 0.01               |                 | 89±58               |                                    |
| 410 | β  | 1     | 0.92           | 0.01               |                 |                     |                                    |

| res | $2^\circ$ | Model | $S^2$ | $S^2_{err}$ | $S_{2f}$  | $\tau_e(\text{ps})$ | $R_{ex}(s^{-1})$ |
|-----|-----------|-------|-------|-------------|-----------|---------------------|------------------|
| 411 | $\beta$   | 2     | 0.89  | 0.01        |           | 69±6                |                  |
| 412 | $\beta$   | 1     | 0.85  | 0.01        |           |                     |                  |
| 413 | $\beta$   | 1     | 0.91  | 0.02        |           |                     |                  |
| 414 |           | P     |       |             |           |                     |                  |
| 415 |           | 2     | 0.79  | 0.01        |           | 31±8                |                  |
| 416 | $\beta$   | 1     | 0.92  | 0.01        |           |                     |                  |
| 417 | $\beta$   | 2     | 0.85  | 0.01        |           | 44±4                |                  |
| 418 | $\beta$   | 5     | 0.81  | 0.01        | 0.89±0.01 | 1341±246            |                  |
| 419 | $\beta$   | 2     | 0.87  | 0.02        |           | 65±22               |                  |
| 420 | $\beta$   | 1     | 0.90  | 0.01        |           |                     |                  |
| 421 | $\beta$   | 2     | 0.88  | 0.01        |           | 58±9                |                  |
| 422 | $\beta$   | 2     | 0.89  | 0.01        |           | 31±11               |                  |
| 423 | $\beta$   | 1     | 0.88  | 0.01        |           |                     |                  |
| 424 | $\beta$   | 3     | 0.85  | 0.01        |           |                     | 0.63±0.16        |
| 425 | $\beta$   | 1     | 0.94  | 0.02        |           |                     |                  |
| 426 | $\beta$   | 1     | 0.96  | 0.02        |           |                     |                  |
| 427 |           | OL    |       |             |           |                     |                  |
| 428 |           | 3     | 0.91  | 0.02        |           |                     | 10.93±0.68       |
| 429 | $\beta$   | X     |       |             |           |                     |                  |
| 430 | $\beta$   | 3     | 0.92  | 0.10        |           |                     | 16.61±2.89       |
| 431 | $\beta$   | 1     | 0.91  | 0.01        |           |                     |                  |
| 432 | $\beta$   | 1     | 0.90  | 0.00        |           |                     |                  |
| 433 | $\beta$   | 1     | 0.92  | 0.02        |           |                     |                  |
| 434 |           | 1     | 0.93  | 0.01        |           |                     |                  |
| 435 | $\beta$   | 1     | 0.89  | 0.03        |           |                     |                  |
| 436 | $\beta$   | 1     | 0.94  | 0.01        |           |                     |                  |
| 437 | $\beta$   | 1     | 0.90  | 0.01        |           |                     |                  |
| 438 | $\beta$   | 1     | 0.97  | 0.01        |           |                     |                  |
| 439 | $\beta$   | OL    |       |             |           |                     |                  |
| 440 | $\beta$   | 3     | 0.94  | 0.01        |           |                     | 1.75±0.48        |

## 12. References for supporting materials

1. Makhatadze, G. I., Medvedkin, V. N. & Privalov, P. L. (1990). Partial molar volumes of polypeptides and their constituent groups in aqueous solution over a broad temperature range. *Biopolymers* **30**, 1001-10.
2. Palmer, A. G., III. (2001). NMR probes of molecular dynamics: overview and comparison with other techniques. *Annu. Rev. Bioph. Biom* **30**, 129-155.
3. Tjandra, N., Wingfield, P., Stahl, S. & Bax, A. (1996). Anisotropic rotational diffusion of perdeuterated HIV protease from <sup>15</sup>N NMR relaxation measurements at two magnetic fields. *J. Biomol. NMR* **8**, 273-284.
4. Pawley, N. H., Wang, C., Koide, S. & Nicholson, L. K. (2001). An improved method for distinguishing between anisotropic tumbling and chemical exchange in analysis of <sup>15</sup>N relaxation parameters. *J Biomol NMR* **20**, 149-65.
5. Brusweiler, R., Liao, X. & Wright, P. E. (1995). Long-range motional restrictions in a multidomain zinc-finger protein from anisotropic tumbling. *Science* **268**, 886-9.
6. Lipari, G. & Szabo, A. (1982). Model-free approach to the interpretation of nuclear magnetic resonance relaxation in macromolecules. 1. Theory and range of validity. *J. Am. Chem. Soc.* **104**, 4546-4559.
7. Lipari, G. & Szabo, A. (1982). Model-free approach to the interpretation of nuclear magnetic resonance relaxation in macromolecules. 2. Analysis of experimental results. *J. Am. Chem. Soc.* **104**, 4559-4570.
8. Clore, G. M., Szabo, A., Bax, A., Kay, L. E., Driscoll, P. C. & Gronenborn, A. M. (1990). Deviations from the simple two-parameter model-free approach to the interpretation of nitrogen-15 nuclear magnetic relaxation of proteins. *J. Am. Chem. Soc.* **112**, 4989-4991.
9. Cole, R. & Loria, J. P. (2003). FAST-Modelfree: A program for rapid automated analysis of solution NMR spin-relaxation data. *J. Biomol. NMR* **26**, 203-213.
10. Van Roey, P., Pereira, B., Li, Z., Hiraga, K., Belfort, M. & Derbyshire, V. (2007). Crystallographic and mutational studies of mycobacterium tuberculosis recA mini-inteins suggest a pivotal role for a highly conserved aspartate residue. *J. Mol. Biol.* **367**, 162-173.
11. Barbato, G., Ikura, M., Kay, L. E., Pastor, R. W. & Bax, A. (1992). Backbone dynamics of calmodulin studied by nitrogen-15 relaxation using inverse detected two-dimensional NMR spectroscopy: the central helix is flexible. *Biochemistry* **31**, 5269-78.
12. Woessner, D. E. (1962). Nuclear spin relaxation in ellipsoids undergoing rotational Brownian motion. *J. Chem. Phys.* **37**, 647-54.
13. Mandel, A. M., Akke, M. & Palmer, A. G., III. (1995). Backbone dynamics of Escherichia coli ribonuclease HI: correlations with structure and function in an active enzyme. *J. Mol. Biol.* **246**, 144-63.
